# Supplementary material for: Synthesis of pyrimido[2,1-a]isoindolone and isoindolo[2,1-a]quinazolinone via intramolecular aza-Prins type reaction
Source: Royal Society of Chemistry journal article supplement (doi:10.1039/d1cc04554g), 2021-01-01

# **Synthesis of Pyrimido[2,1-*a*]isoindolone and Isoindolo[2,1-*a*]quinazolinone *via* Intramolecular Aza-Prins Type Reaction**

Subhamoy Biswas, Bikoshita Porashar, Pallav Jyoti Arandhara and Anil K. Saikia

Department of Chemistry, Indian Institute of Technology Guwahati, Guwahati-781039, Assam, India

## **Table of content**

|                                      |               |
|--------------------------------------|---------------|
| 1. HRMS spectra of all new compounds | <b>S2-S57</b> |
|--------------------------------------|---------------|

## HRMS spectrum of **1a**

|                    |                   |                               |         |                        |                                  |
|--------------------|-------------------|-------------------------------|---------|------------------------|----------------------------------|
| <b>Sample Name</b> | SB-138            | <b>Position</b>               | P1-D1   | <b>Instrument Name</b> | Instrument 1                     |
| <b>User Name</b>   |                   | <b>Inj Vol</b>                | 20      | <b>InjPosition</b>     |                                  |
| <b>Sample Type</b> | Sample            | <b>IRM Calibration Status</b> | Success | <b>Data Filename</b>   | SB-138.d                         |
| <b>ACQ Method</b>  | ESI ALS 100-600.m | <b>Comment</b>                |         | <b>Acquired Time</b>   | 12/3/2020 3:43:52 PM (UTC+05:30) |

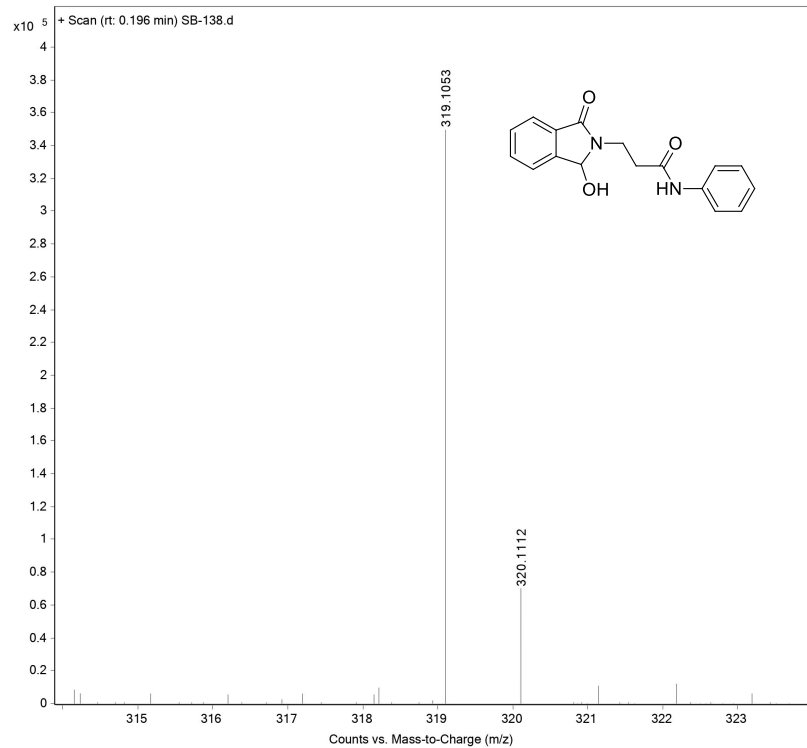

# HRMS spectrum of **1b**

|                    |                   |                               |         |                        |                                  |
|--------------------|-------------------|-------------------------------|---------|------------------------|----------------------------------|
| <b>Sample Name</b> | SB-203            | <b>Position</b>               | P1-C5   | <b>Instrument Name</b> | Instrument 1                     |
| <b>User Name</b>   |                   | <b>Inj Vol</b>                | 20      | <b>InjPosition</b>     |                                  |
| <b>Sample Type</b> | Sample            | <b>IRM Calibration Status</b> | Success | <b>Data Filename</b>   | SB-203.d                         |
| <b>ACQ Method</b>  | ESI ALS 100-600.m | <b>Comment</b>                |         | <b>Acquired Time</b>   | 12/3/2020 7:02:39 PM (UTC+05:30) |

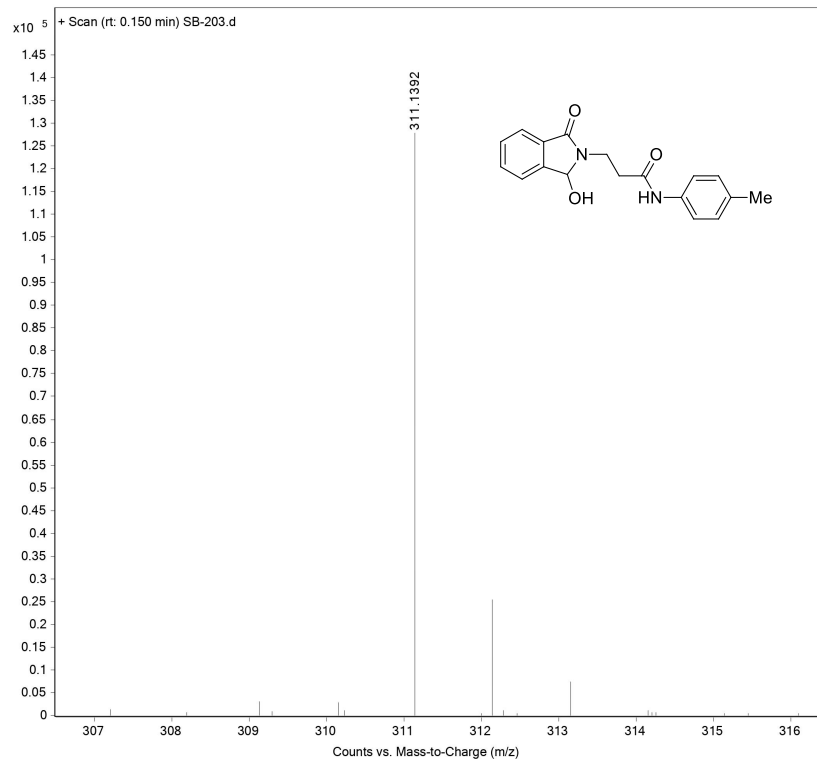

# HRMS spectrum of **1c**

|                    |                   |                               |         |                        |                                  |
|--------------------|-------------------|-------------------------------|---------|------------------------|----------------------------------|
| <b>Sample Name</b> | SB-194            | <b>Position</b>               | P1-C1   | <b>Instrument Name</b> | Instrument 1                     |
| <b>User Name</b>   |                   | <b>Inj Vol</b>                | 20      | <b>InjPosition</b>     |                                  |
| <b>Sample Type</b> | Sample            | <b>IRM Calibration Status</b> | Success | <b>Data Filename</b>   | SB-194.d                         |
| <b>ACQ Method</b>  | ESI ALS 100-600.m | <b>Comment</b>                |         | <b>Acquired Time</b>   | 12/3/2020 6:27:50 PM (UTC+05:30) |

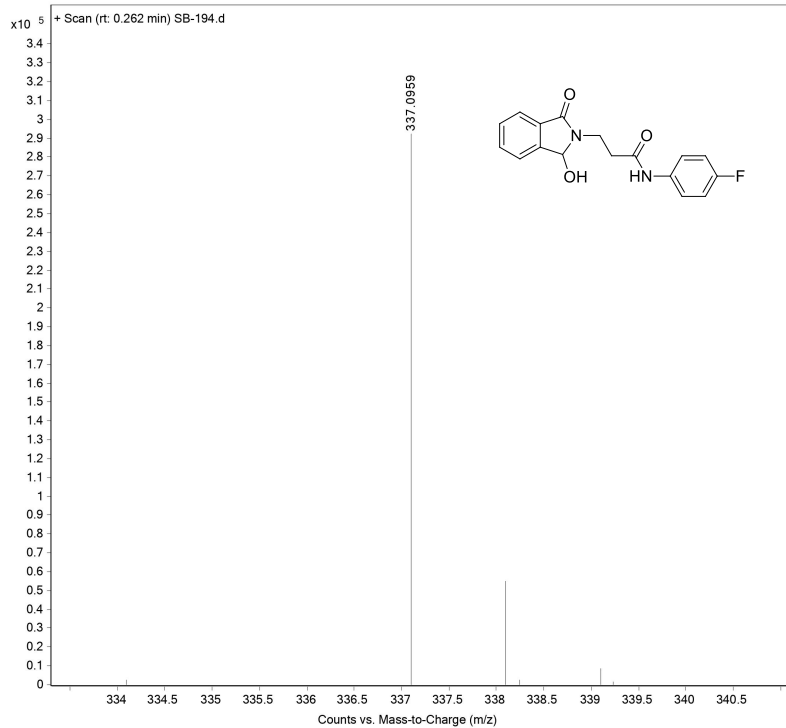



# HRMS spectrum of **1d**

|                    |                   |                               |         |                        |                                  |
|--------------------|-------------------|-------------------------------|---------|------------------------|----------------------------------|
| <b>Sample Name</b> | SB-182            | <b>Position</b>               | P1-D3   | <b>Instrument Name</b> | Instrument 1                     |
| <b>User Name</b>   |                   | <b>Inj Vol</b>                | 20      | <b>InjPosition</b>     |                                  |
| <b>Sample Type</b> | Sample            | <b>IRM Calibration Status</b> | Success | <b>Data Filename</b>   | SB-182.d                         |
| <b>ACQ Method</b>  | ESI ALS 100-600.m | <b>Comment</b>                |         | <b>Acquired Time</b>   | 12/3/2020 3:47:36 PM (UTC+05:30) |

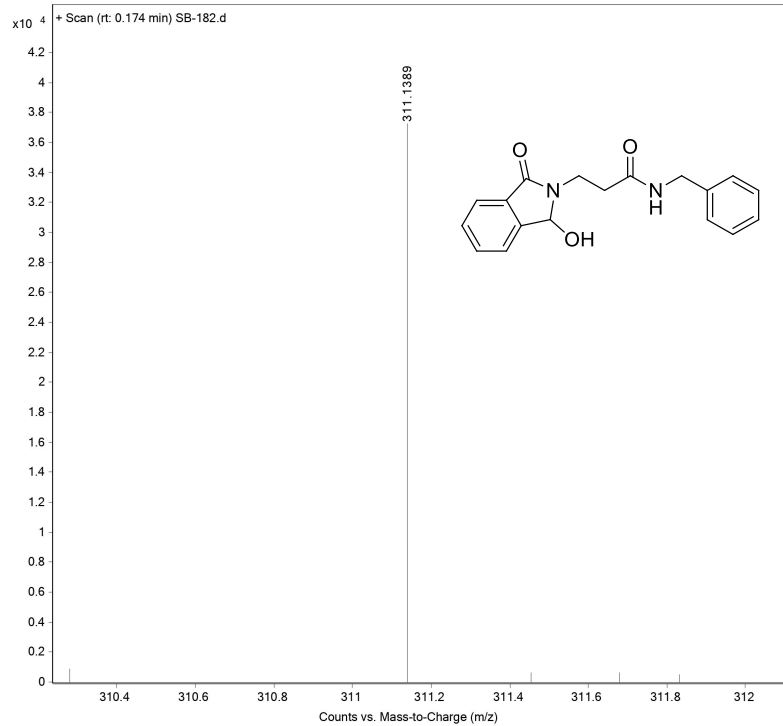

# HRMS spectrum of 1e

|                    |                   |                               |         |                        |                                  |
|--------------------|-------------------|-------------------------------|---------|------------------------|----------------------------------|
| <b>Sample Name</b> | SB-188            | <b>Position</b>               | P1-D5   | <b>Instrument Name</b> | Instrument 1                     |
| <b>User Name</b>   |                   | <b>Inj Vol</b>                | 20      | <b>InjPosition</b>     |                                  |
| <b>Sample Type</b> | Sample            | <b>IRM Calibration Status</b> | Success | <b>Data Filename</b>   | SB-188.d                         |
| <b>ACQ Method</b>  | ESI ALS 100-600.m | <b>Comment</b>                |         | <b>Acquired Time</b>   | 12/3/2020 3:51:20 PM (UTC+05:30) |

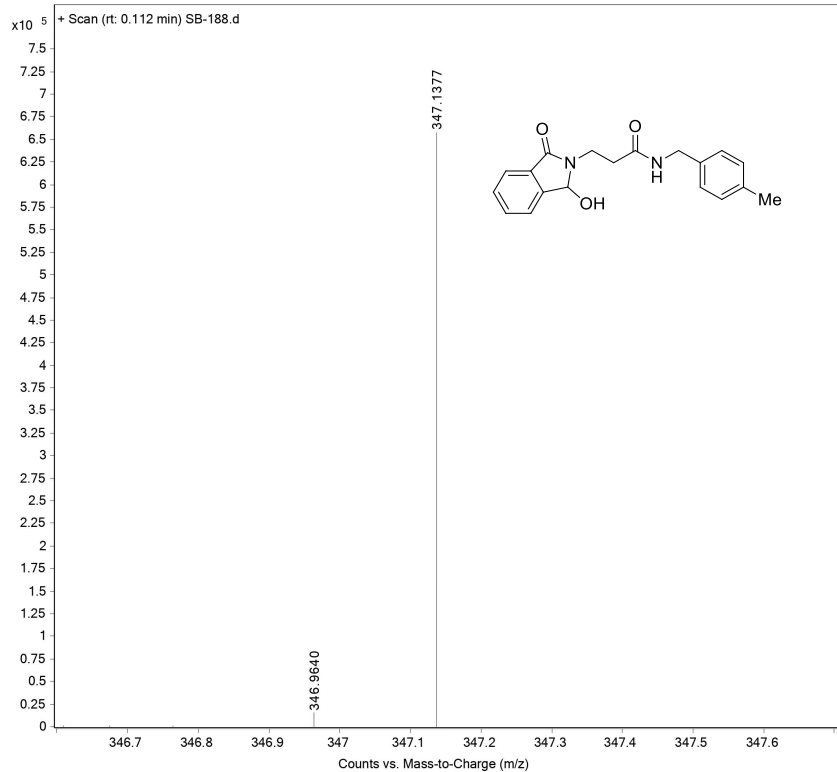

# HRMS spectrum of **1f**

**Sample Name**  
**User Name**  
**Sample Type**  
**ACQ Method**

SB-202  
Sample  
ESI ALS 100-600.m

**Position**  
**Inj Vol**  
**IRM Calibration Status**  
**Comment**

P1-C4  
20  
Success

**Instrument Name**  
**InjPosition**  
**Data Filename**  
**Acquired Time**

Instrument 1  
SB-202.d  
12/3/2020 7:00:45 PM (UTC+05:30)

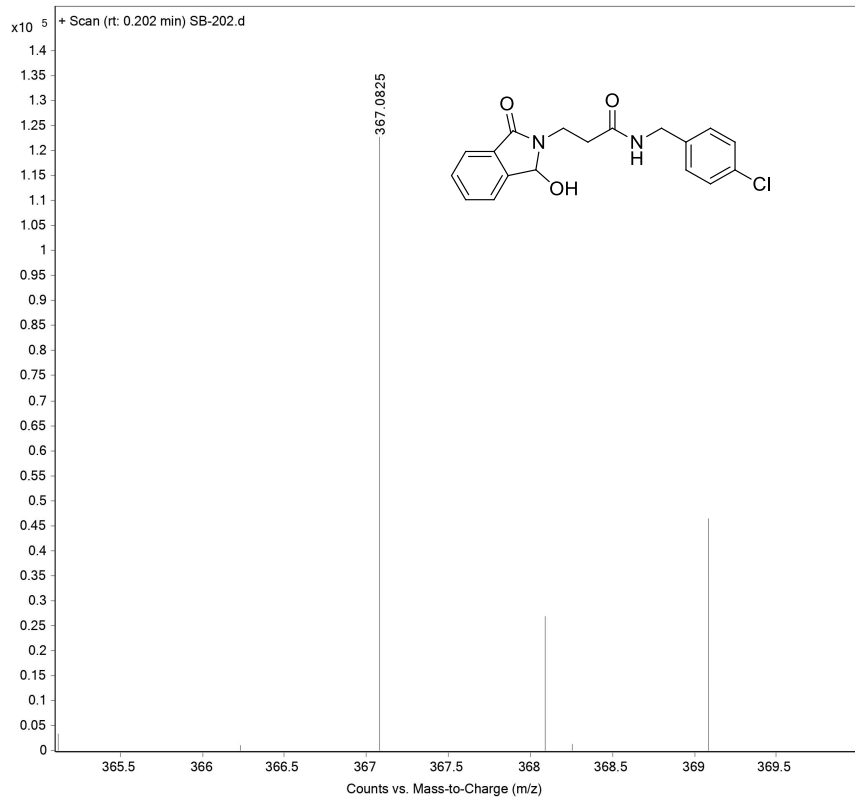

# HRMS spectrum of **1g**

|                    |                   |                               |         |                        |                                  |
|--------------------|-------------------|-------------------------------|---------|------------------------|----------------------------------|
| <b>Sample Name</b> | SB-207            | <b>Position</b>               | P1-C8   | <b>Instrument Name</b> | Instrument 1                     |
| <b>User Name</b>   |                   | <b>Inj Vol</b>                | 20      | <b>InjPosition</b>     |                                  |
| <b>Sample Type</b> | Sample            | <b>IRM Calibration Status</b> | Success | <b>Data Filename</b>   | SB-207.d                         |
| <b>ACQ Method</b>  | ESI ALS 100-600.m | <b>Comment</b>                |         | <b>Acquired Time</b>   | 12/3/2020 7:13:48 PM (UTC+05:30) |

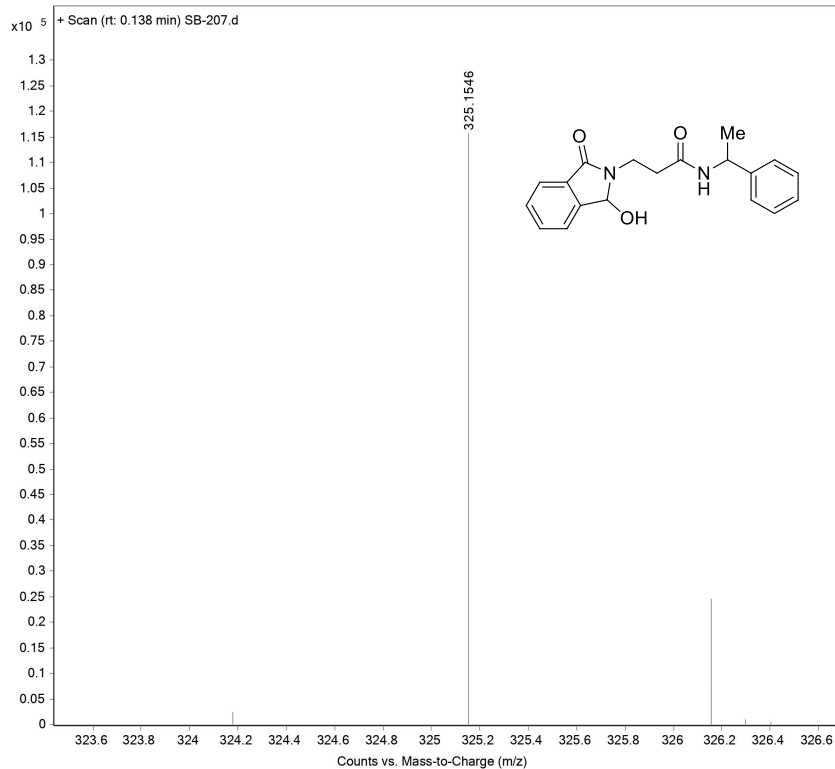

# HRMS spectrum of **1h**

|                    |                   |                               |         |                        |                                  |
|--------------------|-------------------|-------------------------------|---------|------------------------|----------------------------------|
| <b>Sample Name</b> | SAMPLE            | <b>Position</b>               | P1-C1   | <b>Instrument Name</b> | Instrument 1                     |
| <b>User Name</b>   |                   | <b>Inj Vol</b>                | 20      | <b>InjPosition</b>     |                                  |
| <b>Sample Type</b> | Sample            | <b>IRM Calibration Status</b> | Success | <b>Data Filename</b>   | SB-228.d                         |
| <b>ACQ Method</b>  | ESI ALS 150-600.m | <b>Comment</b>                |         | <b>Acquired Time</b>   | 12/4/2020 1:14:11 PM (UTC+05:30) |

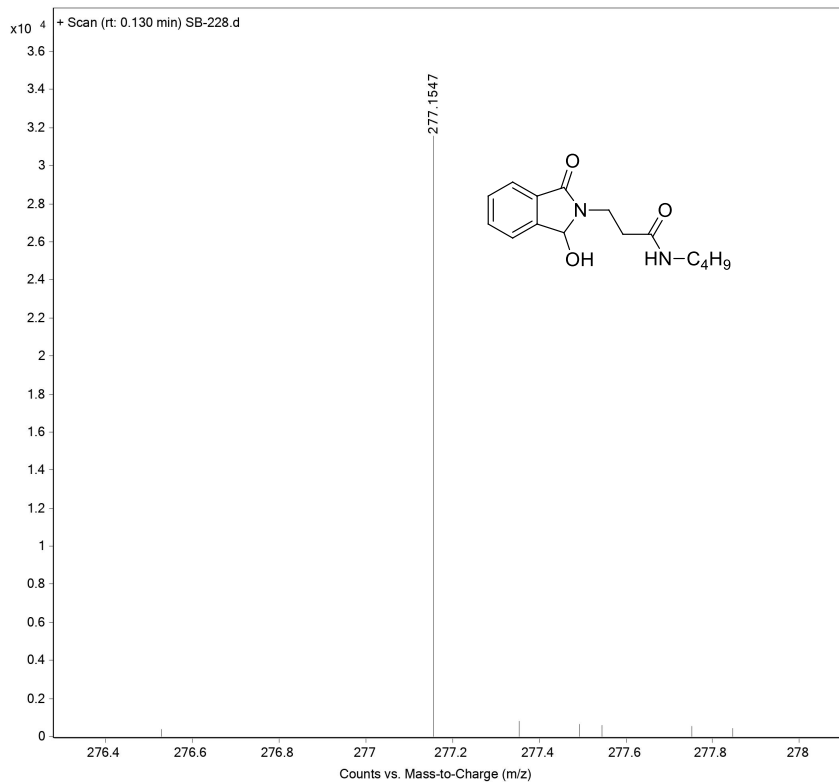

# HRMS spectrum of **1i**

|                    |                    |                               |         |                        |                                 |
|--------------------|--------------------|-------------------------------|---------|------------------------|---------------------------------|
| <b>Sample Name</b> | WASH               | <b>Position</b>               | P1-E1   | <b>Instrument Name</b> | Instrument 1                    |
| <b>User Name</b>   |                    | <b>Inj Vol</b>                | 20      | <b>InjPosition</b>     |                                 |
| <b>Sample Type</b> | Sample             | <b>IRM Calibration Status</b> | Success | <b>Data Filename</b>   | SB-254.d                        |
| <b>ACQ Method</b>  | ESI ALS 100-1000.m | <b>Comment</b>                |         | <b>Acquired Time</b>   | 1/7/2021 6:49:55 PM (UTC+05:30) |

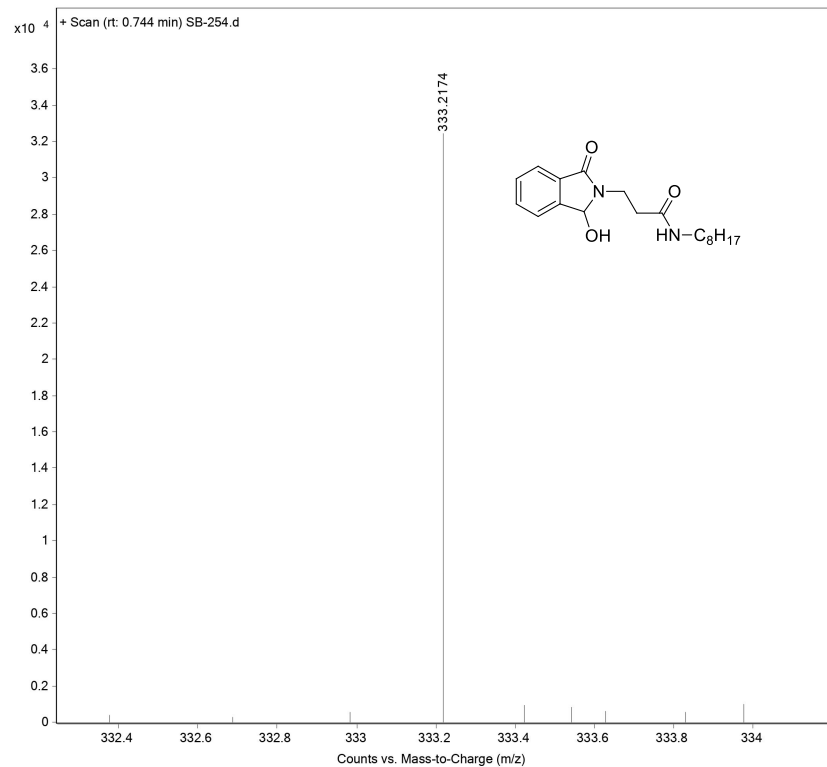

# HRMS spectrum of 1j

|                    |                   |                               |         |                        |                                    |
|--------------------|-------------------|-------------------------------|---------|------------------------|------------------------------------|
| <b>Sample Name</b> | SAMPLE            | <b>Position</b>               | P1-B4   | <b>Instrument Name</b> | Instrument 1                       |
| <b>User Name</b>   |                   | <b>Inj Vol</b>                | 20      | <b>InjPosition</b>     |                                    |
| <b>Sample Type</b> | Sample            | <b>IRM Calibration Status</b> | Success | <b>Data Filename</b>   | SB-242.d                           |
| <b>ACQ Method</b>  | ESI ALS 150-600.m | <b>Comment</b>                |         | <b>Acquired Time</b>   | 12/11/2020 11:57:05 AM (UTC+05:30) |

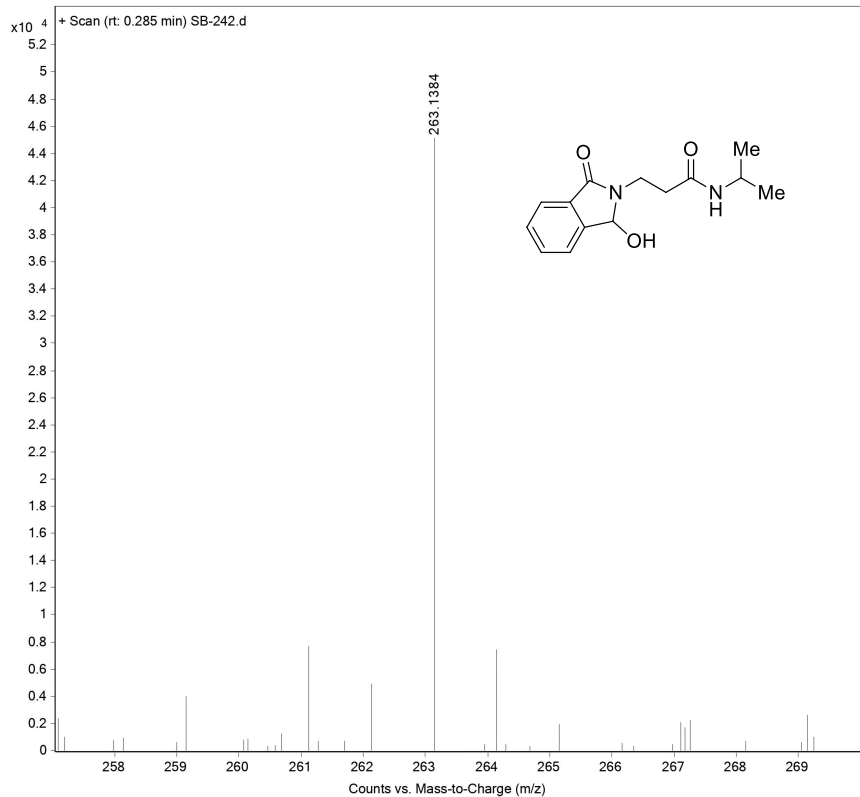

# HRMS spectrum of **1k**

|                    |                   |                               |         |                        |                                    |
|--------------------|-------------------|-------------------------------|---------|------------------------|------------------------------------|
| <b>Sample Name</b> | SAMPLE            | <b>Position</b>               | P1-B5   | <b>Instrument Name</b> | Instrument 1                       |
| <b>User Name</b>   |                   | <b>Inj Vol</b>                | 20      | <b>InjPosition</b>     |                                    |
| <b>Sample Type</b> | Sample            | <b>IRM Calibration Status</b> | Success | <b>Data Filename</b>   | SB-243.d                           |
| <b>ACQ Method</b>  | ESI ALS 150-600.m | <b>Comment</b>                |         | <b>Acquired Time</b>   | 12/11/2020 11:58:58 AM (UTC+05:30) |

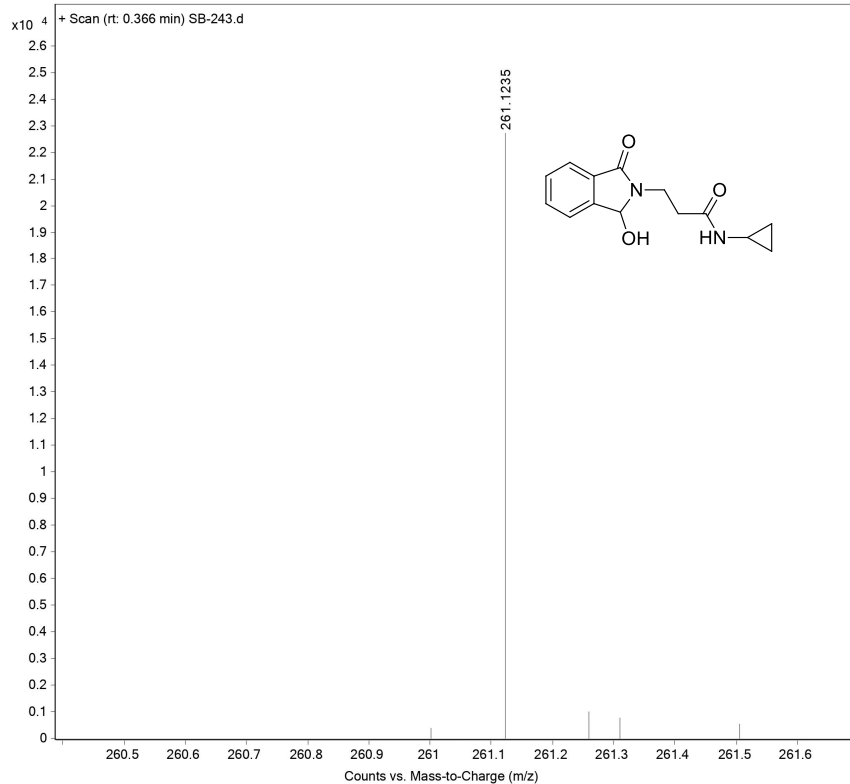



## HRMS spectrum of **1l**

|                    |                   |                               |         |                        |                                  |
|--------------------|-------------------|-------------------------------|---------|------------------------|----------------------------------|
| <b>Sample Name</b> | SB-201            | <b>Position</b>               | P1-C3   | <b>Instrument Name</b> | Instrument 1                     |
| <b>User Name</b>   |                   | <b>Inj Vol</b>                | 20      | <b>InjPosition</b>     |                                  |
| <b>Sample Type</b> | Sample            | <b>IRM Calibration Status</b> | Success | <b>Data Filename</b>   | SB-201.d                         |
| <b>ACQ Method</b>  | ESI ALS 100-600.m | <b>Comment</b>                |         | <b>Acquired Time</b>   | 12/3/2020 6:36:30 PM (UTC+05:30) |

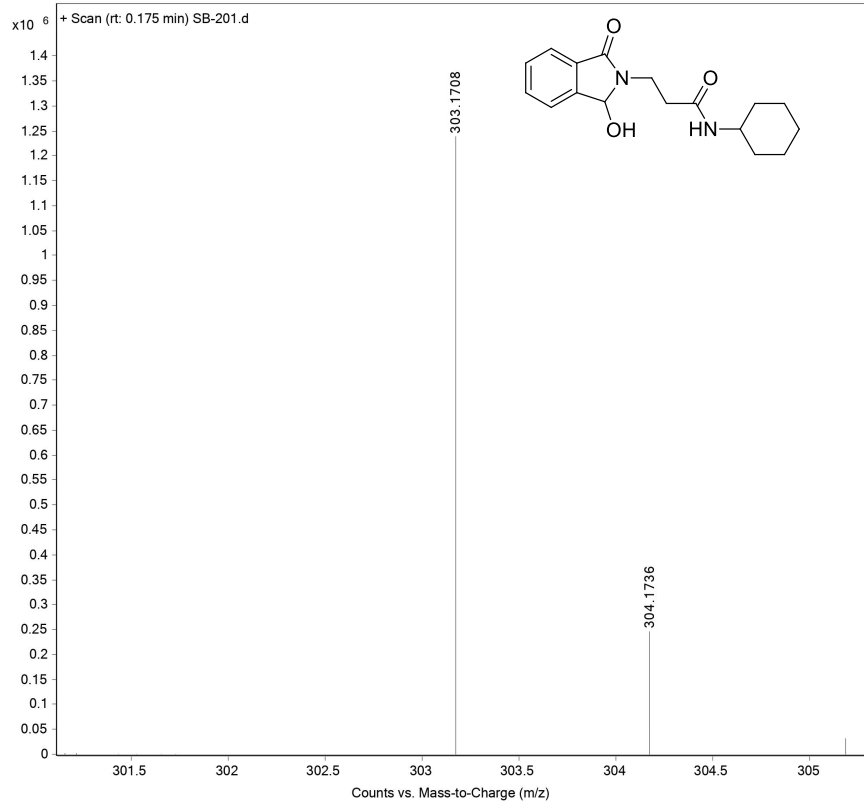

# HRMS spectrum of 1m

|             |                   |                        |         |                 |                                  |
|-------------|-------------------|------------------------|---------|-----------------|----------------------------------|
| Sample Name | SAMPLE            | Position               | P1-C1   | Instrument Name | Instrument 1                     |
| User Name   |                   | Inj Vol                | 20      | InjPosition     |                                  |
| Sample Type | Sample            | IRM Calibration Status | Success | Data Filename   | SB-237.d                         |
| ACQ Method  | ESI ALS 150-600.m | Comment                |         | Acquired Time   | 12/4/2020 1:16:15 PM (UTC+05:30) |

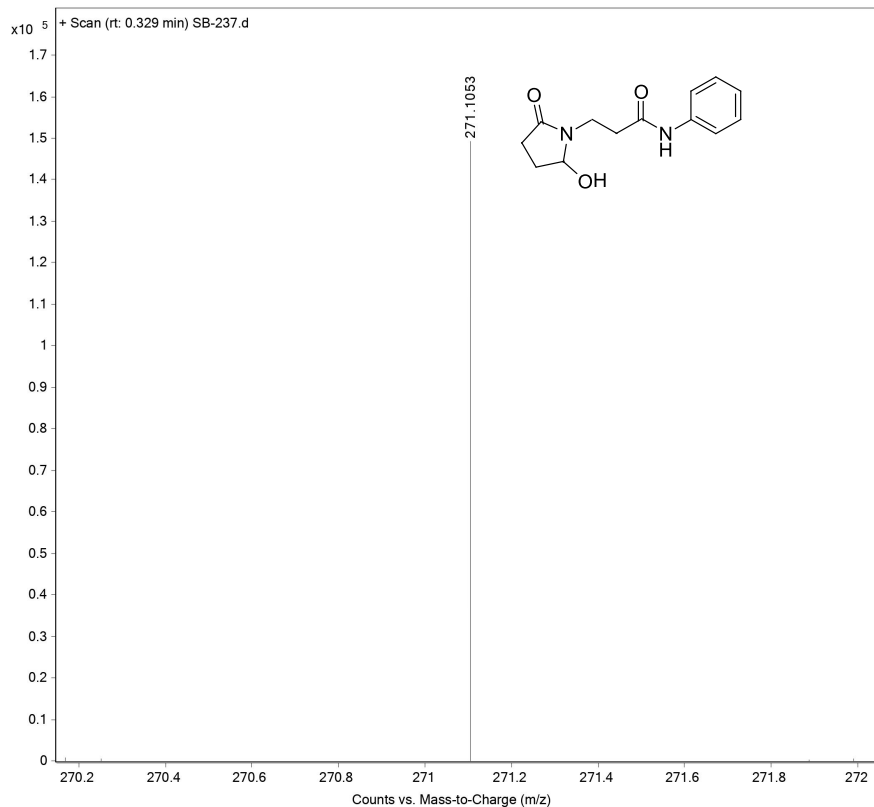

# HRMS spectrum of **1n**

|                    |                   |                               |         |                        |                                  |
|--------------------|-------------------|-------------------------------|---------|------------------------|----------------------------------|
| <b>Sample Name</b> | SAMPLE            | <b>Position</b>               | P1-C1   | <b>Instrument Name</b> | Instrument 1                     |
| <b>User Name</b>   |                   | <b>Inj Vol</b>                | 20      | <b>InjPosition</b>     |                                  |
| <b>Sample Type</b> | Sample            | <b>IRM Calibration Status</b> | Success | <b>Data Filename</b>   | SB-227.d                         |
| <b>ACQ Method</b>  | ESI ALS 150-600.m | <b>Comment</b>                |         | <b>Acquired Time</b>   | 12/4/2020 1:12:02 PM (UTC+05:30) |

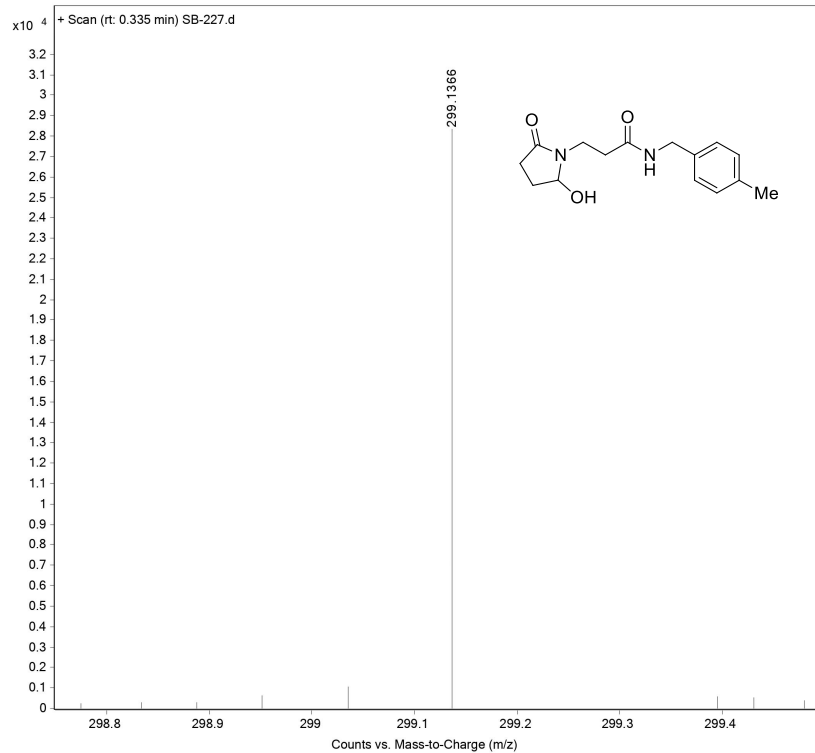

# HRMS spectrum of **1o**

|                    |                   |                               |         |                        |                                  |
|--------------------|-------------------|-------------------------------|---------|------------------------|----------------------------------|
| <b>Sample Name</b> | SB-280-R2         | <b>Position</b>               | P2-A11  | <b>Instrument Name</b> | Instrument 1                     |
| <b>User Name</b>   |                   | <b>Inj Vol</b>                | 20      | <b>InjPosition</b>     |                                  |
| <b>Sample Type</b> | Sample            | <b>IRM Calibration Status</b> | Success | <b>Data Filename</b>   | SB-280-R2.d                      |
| <b>ACQ Method</b>  | EST ALS 100-600.m | <b>Comment</b>                |         | <b>Acquired Time</b>   | 2/16/2021 7:16:19 PM (UTC+05:30) |

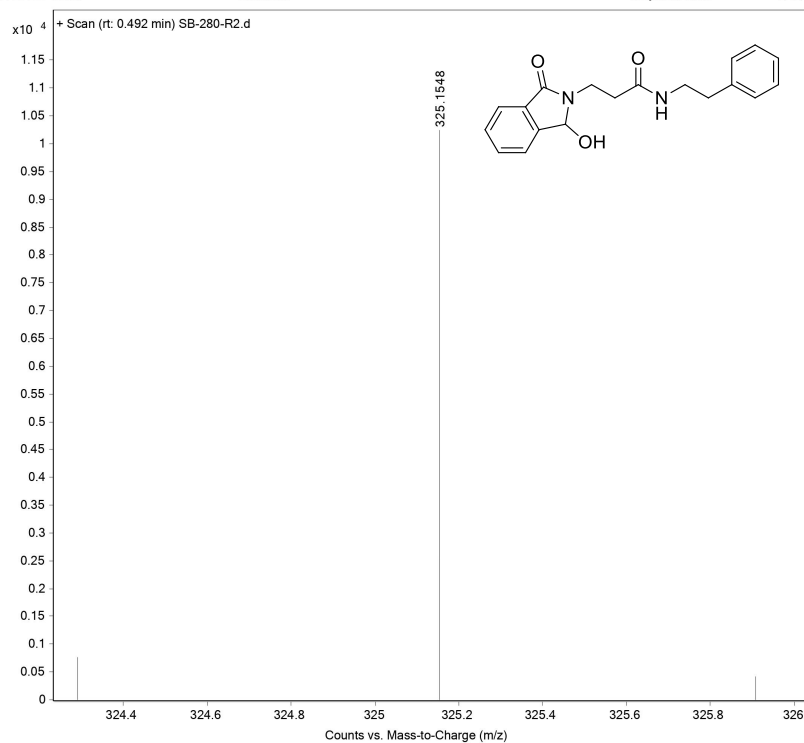

# HRMS spectrum of 1p

|                    |                   |                               |         |                        |                                  |
|--------------------|-------------------|-------------------------------|---------|------------------------|----------------------------------|
| <b>Sample Name</b> | SB-277-R2         | <b>Position</b>               | P2-A10  | <b>Instrument Name</b> | Instrument 1                     |
| <b>User Name</b>   |                   | <b>Inj Vol</b>                | 20      | <b>InjPosition</b>     |                                  |
| <b>Sample Type</b> | Sample            | <b>IRM Calibration Status</b> | Success | <b>Data Filename</b>   | SB-277-R2.d                      |
| <b>ACQ Method</b>  | ESI ALS 100-600.m | <b>Comment</b>                |         | <b>Acquired Time</b>   | 2/16/2021 7:05:08 PM (UTC+05:30) |

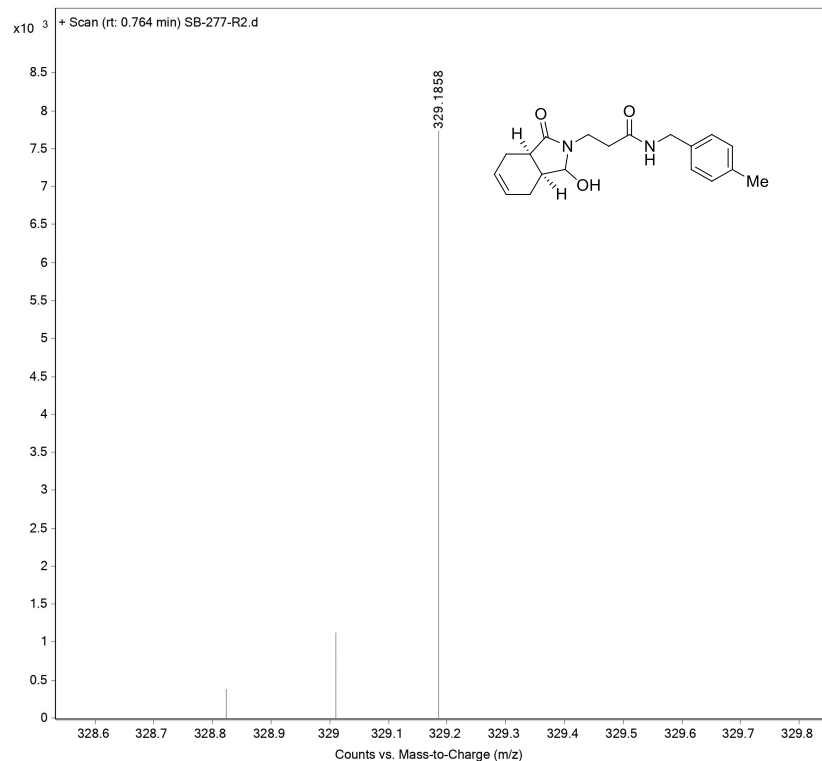

## HRMS spectrum of **1q**

|                    |                   |                               |         |                        |                                  |
|--------------------|-------------------|-------------------------------|---------|------------------------|----------------------------------|
| <b>Sample Name</b> | SAMPLE            | <b>Position</b>               | P1-B5   | <b>Instrument Name</b> | Instrument 1                     |
| <b>User Name</b>   |                   | <b>Inj Vol</b>                | 20      | <b>InjPosition</b>     |                                  |
| <b>Sample Type</b> | Sample            | <b>IRM Calibration Status</b> | Success | <b>Data Filename</b>   | SB-273.d                         |
| <b>ACQ Method</b>  | ESI ALS 100-700.m | <b>Comment</b>                |         | <b>Acquired Time</b>   | 1/21/2021 6:24:59 PM (UTC+05:30) |

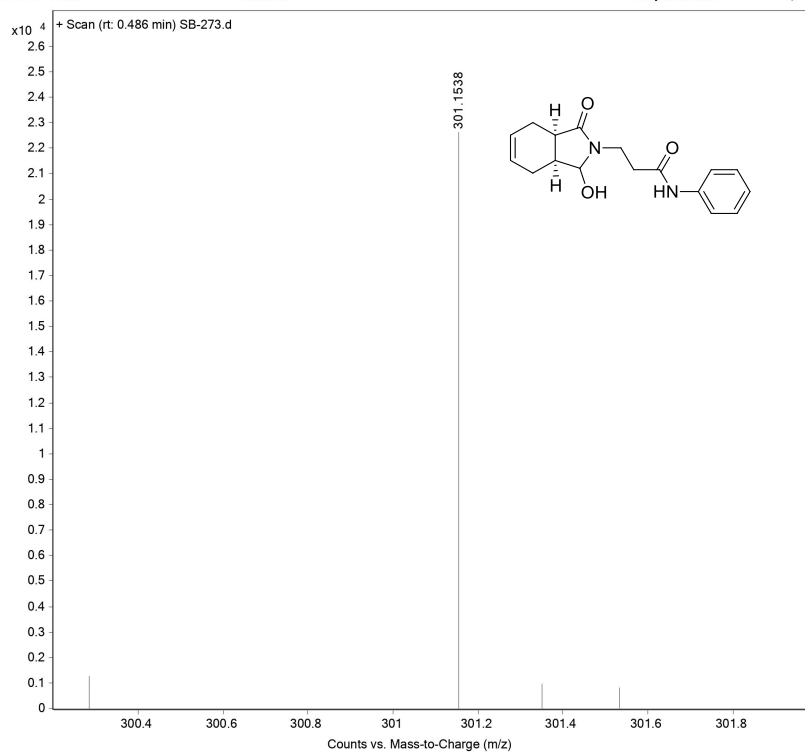

# HRMS spectrum of **1r**

|                    |                    |                               |         |                        |                                  |
|--------------------|--------------------|-------------------------------|---------|------------------------|----------------------------------|
| <b>Sample Name</b> | SAMPLE 5           | <b>Position</b>               | P2-A6   | <b>Instrument Name</b> | Instrument 1                     |
| <b>User Name</b>   |                    | <b>Inj Vol</b>                | 20      | <b>InjPosition</b>     |                                  |
| <b>Sample Type</b> | Sample             | <b>IRM Calibration Status</b> | Success | <b>Data Filename</b>   | SB-294.d                         |
| <b>ACQ Method</b>  | ESI ALS 100-1000.m | <b>Comment</b>                |         | <b>Acquired Time</b>   | 3/12/2021 7:28:08 PM (UTC+05:30) |

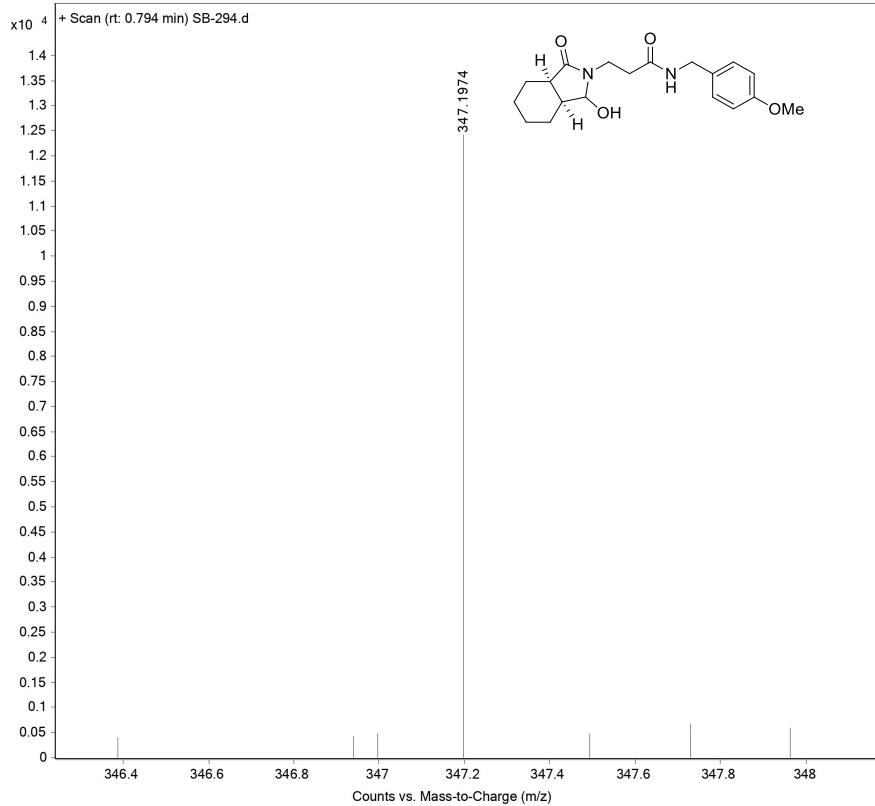

# HRMS spectrum of **1s**

|                    |                    |                               |         |                        |                                  |
|--------------------|--------------------|-------------------------------|---------|------------------------|----------------------------------|
| <b>Sample Name</b> | SAMPLE             | <b>Position</b>               | P1-D2   | <b>Instrument Name</b> | Instrument 1                     |
| <b>User Name</b>   |                    | <b>Inj Vol</b>                | 20      | <b>InjPosition</b>     |                                  |
| <b>Sample Type</b> | Sample             | <b>IRM Calibration Status</b> | Success | <b>Data Filename</b>   | SB-300.d                         |
| <b>ACQ Method</b>  | ESI ALS 100-1000.m | <b>Comment</b>                |         | <b>Acquired Time</b>   | 3/11/2021 9:17:16 PM (UTC+05:30) |

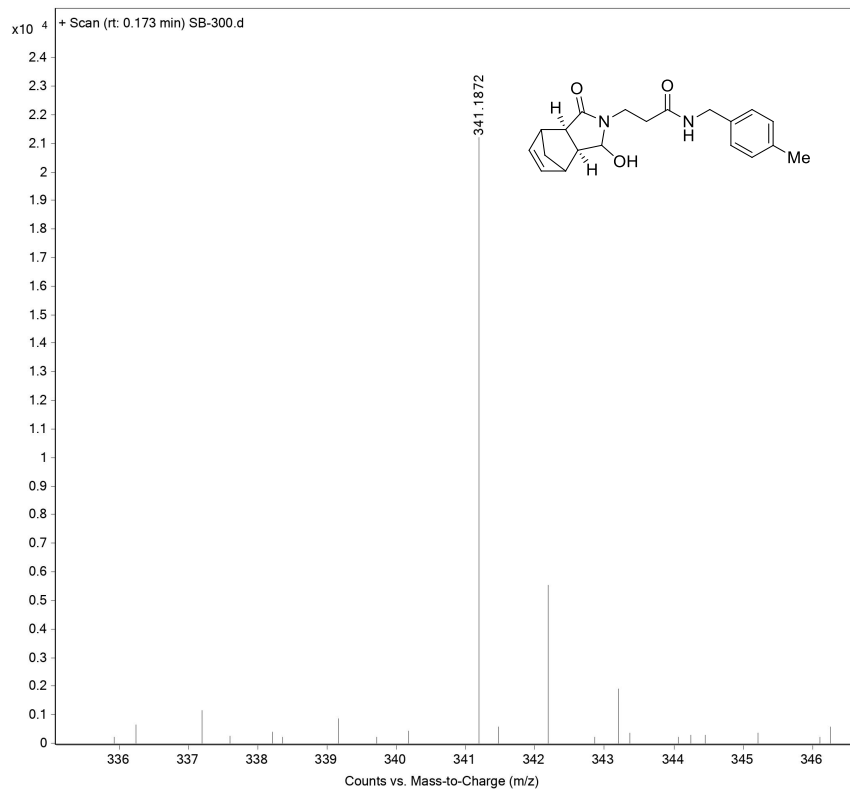



# HRMS spectrum of **1t**

|             |                   |                        |         |                 |                                  |
|-------------|-------------------|------------------------|---------|-----------------|----------------------------------|
| Sample Name | SAMPLE            | Position               | P1-B4   | Instrument Name | Instrument 1                     |
| User Name   |                   | Inj Vol                | 20      | InjPosition     |                                  |
| Sample Type | Sample            | IRM Calibration Status | Success | Data Filename   | SB-270.d                         |
| ACQ Method  | ESI ALS 100-700.m | Comment                |         | Acquired Time   | 1/21/2021 6:13:30 PM (UTC+05:30) |

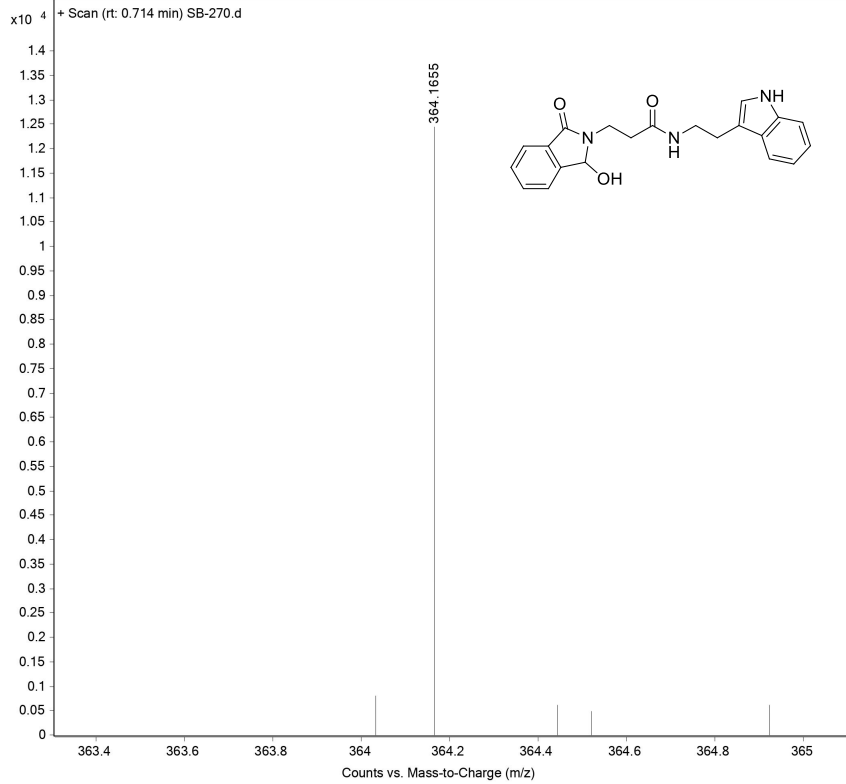

# HRMS spectrum of **1u**

|                    |                   |                               |         |                        |                                 |
|--------------------|-------------------|-------------------------------|---------|------------------------|---------------------------------|
| <b>Sample Name</b> | SAMPLE 3          | <b>Position</b>               | P1-A2   | <b>Instrument Name</b> | Instrument 1                    |
| <b>User Name</b>   |                   | <b>Inj Vol</b>                | 20      | <b>InjPosition</b>     |                                 |
| <b>Sample Type</b> | Sample            | <b>IRM Calibration Status</b> | Success | <b>Data Filename</b>   | SB-316.d                        |
| <b>ACQ Method</b>  | ESI ALS 150-600.m | <b>Comment</b>                |         | <b>Acquired Time</b>   | 21-04-2021 20:23:06 (UTC+05:30) |

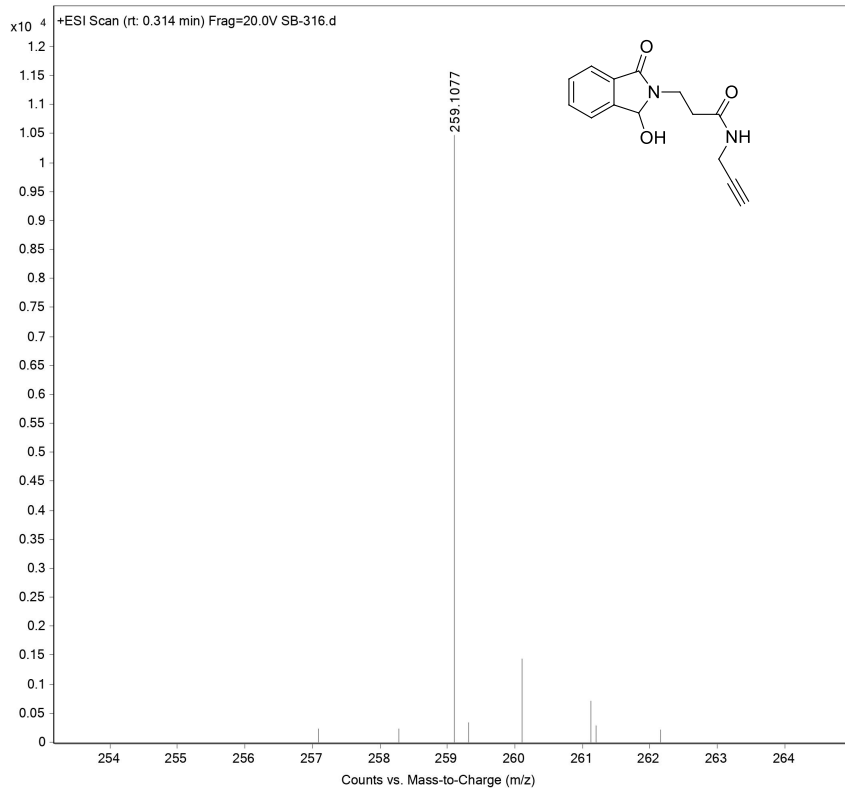

## HRMS spectrum of **1v**

|                    |                    |                               |         |                        |                                 |
|--------------------|--------------------|-------------------------------|---------|------------------------|---------------------------------|
| <b>Sample Name</b> | WASH               | <b>Position</b>               | P2-B5   | <b>Instrument Name</b> | Instrument 1                    |
| <b>User Name</b>   |                    | <b>Inj Vol</b>                | 20      | <b>InjPosition</b>     |                                 |
| <b>Sample Type</b> | Sample             | <b>IRM Calibration Status</b> | Success | <b>Data Filename</b>   | SB-380.d                        |
| <b>ACQ Method</b>  | ESI ALS 100-1000.m | <b>Comment</b>                |         | <b>Acquired Time</b>   | 05-08-2021 18:19:06 (UTC+05:30) |

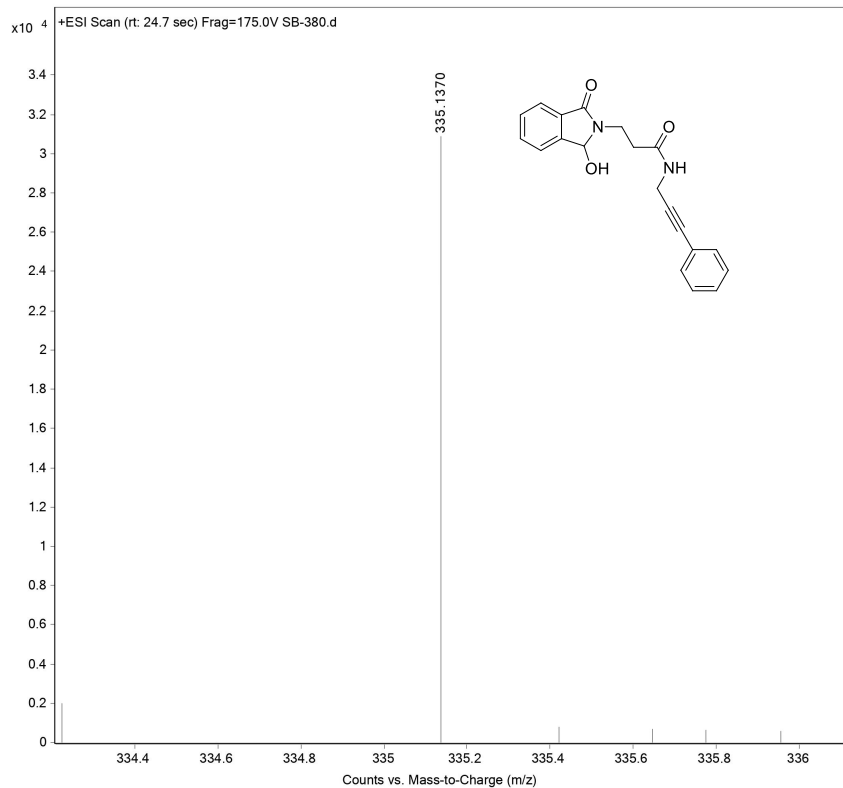

# HRMS spectrum of **1w**

|                    |                   |                               |         |                        |                                  |
|--------------------|-------------------|-------------------------------|---------|------------------------|----------------------------------|
| <b>Sample Name</b> | SAMPLE            | <b>Position</b>               | P1-C1   | <b>Instrument Name</b> | Instrument 1                     |
| <b>User Name</b>   |                   | <b>Inj Vol</b>                | 20      | <b>InjPosition</b>     |                                  |
| <b>Sample Type</b> | Sample            | <b>IRM Calibration Status</b> | Success | <b>Data Filename</b>   | SB-218.d                         |
| <b>ACQ Method</b>  | EST ALS 150-600.m | <b>Comment</b>                |         | <b>Acquired Time</b>   | 12/4/2020 1:07:46 PM (UTC+05:30) |

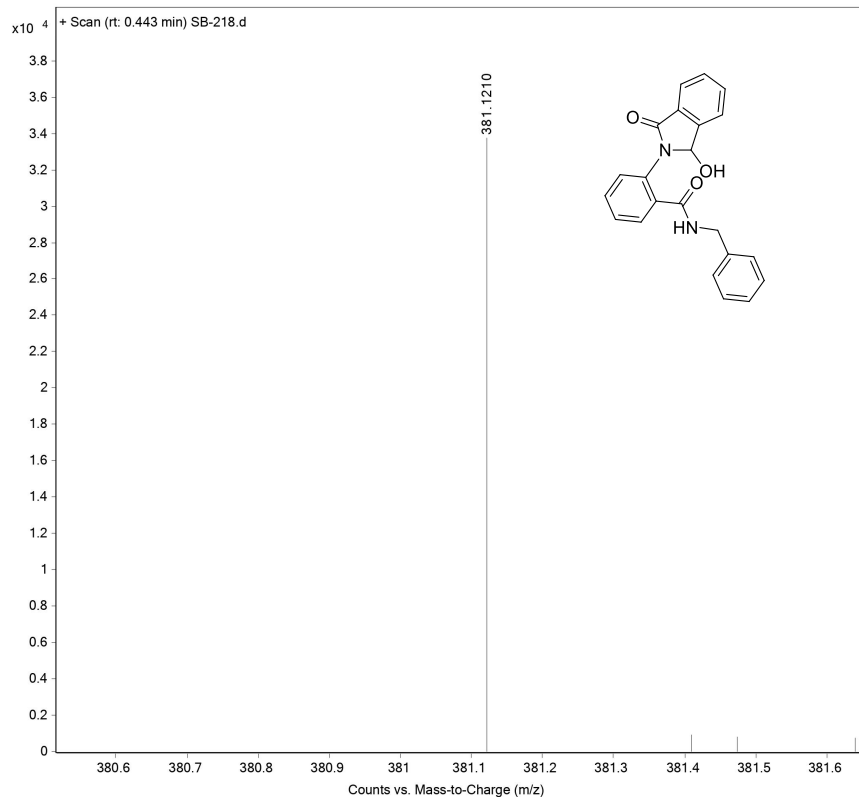

# HRMS spectrum of **1x**

|                    |                   |                               |         |                        |                                  |
|--------------------|-------------------|-------------------------------|---------|------------------------|----------------------------------|
| <b>Sample Name</b> | SAMPLE            | <b>Position</b>               | P1-C6   | <b>Instrument Name</b> | Instrument 1                     |
| <b>User Name</b>   |                   | <b>Inj Vol</b>                | 20      | <b>InjPosition</b>     |                                  |
| <b>Sample Type</b> | Sample            | <b>IRM Calibration Status</b> | Success | <b>Data Filename</b>   | SB-286.d                         |
| <b>ACQ Method</b>  | ESI ALS 100-600.m | <b>Comment</b>                |         | <b>Acquired Time</b>   | 3/4/2021 12:16:16 PM (UTC+05:30) |

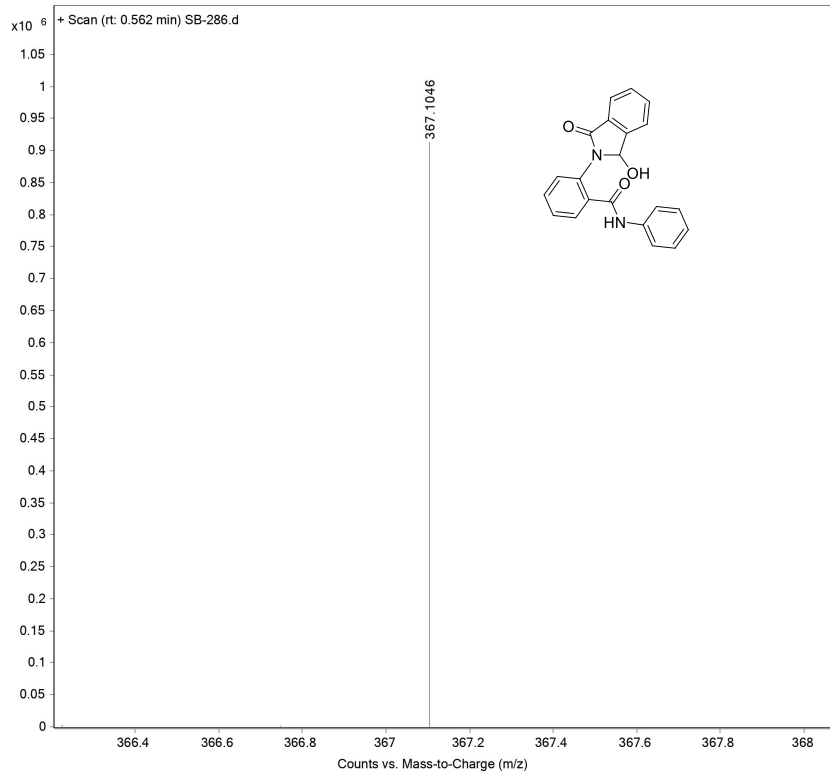

# HRMS spectrum of **1y**

|                    |                   |                               |         |                        |                                  |
|--------------------|-------------------|-------------------------------|---------|------------------------|----------------------------------|
| <b>Sample Name</b> | SAMPLE            | <b>Position</b>               | P1-C7   | <b>Instrument Name</b> | Instrument 1                     |
| <b>User Name</b>   |                   | <b>Inj Vol</b>                | 20      | <b>InjPosition</b>     |                                  |
| <b>Sample Type</b> | Sample            | <b>IRM Calibration Status</b> | Success | <b>Data Filename</b>   | SB-287.d                         |
| <b>ACQ Method</b>  | ESI ALS 100-600.m | <b>Comment</b>                |         | <b>Acquired Time</b>   | 3/4/2021 12:18:09 PM (UTC+05:30) |

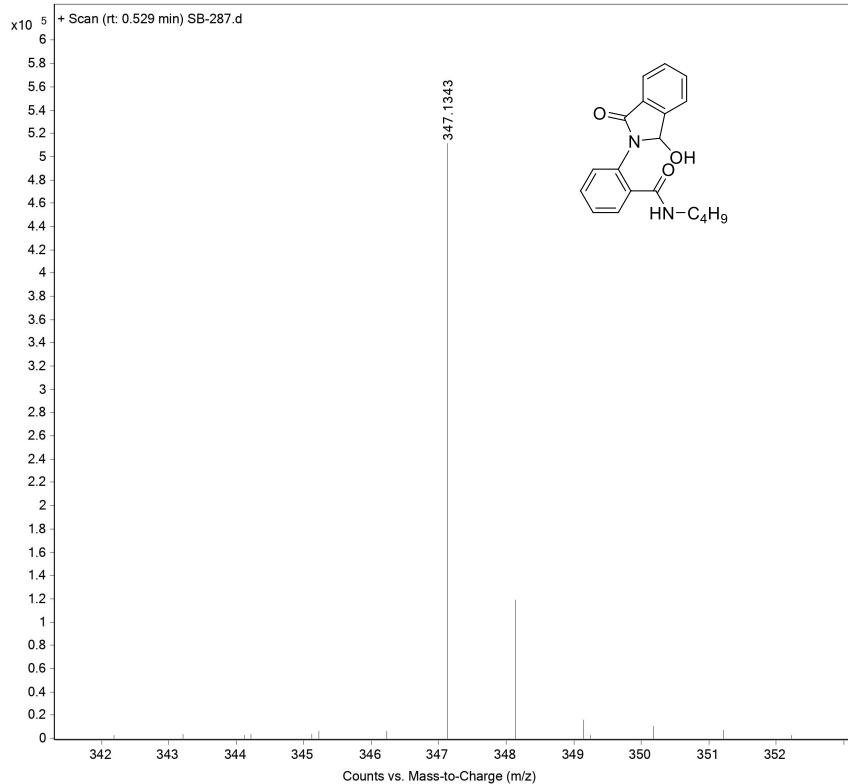

# HRMS spectrum of **1z**

|                    |                    |                               |         |                        |                                 |
|--------------------|--------------------|-------------------------------|---------|------------------------|---------------------------------|
| <b>Sample Name</b> | WASH               | <b>Position</b>               | P2-A8   | <b>Instrument Name</b> | Instrument 1                    |
| <b>User Name</b>   |                    | <b>Inj Vol</b>                | 20      | <b>InjPosition</b>     |                                 |
| <b>Sample Type</b> | Sample             | <b>IRM Calibration Status</b> | Success | <b>Data Filename</b>   | SB-344-R1.d                     |
| <b>ACQ Method</b>  | ESI ALS 100-1000.m | <b>Comment</b>                |         | <b>Acquired Time</b>   | 22-07-2021 16:44:16 (UTC+05:30) |

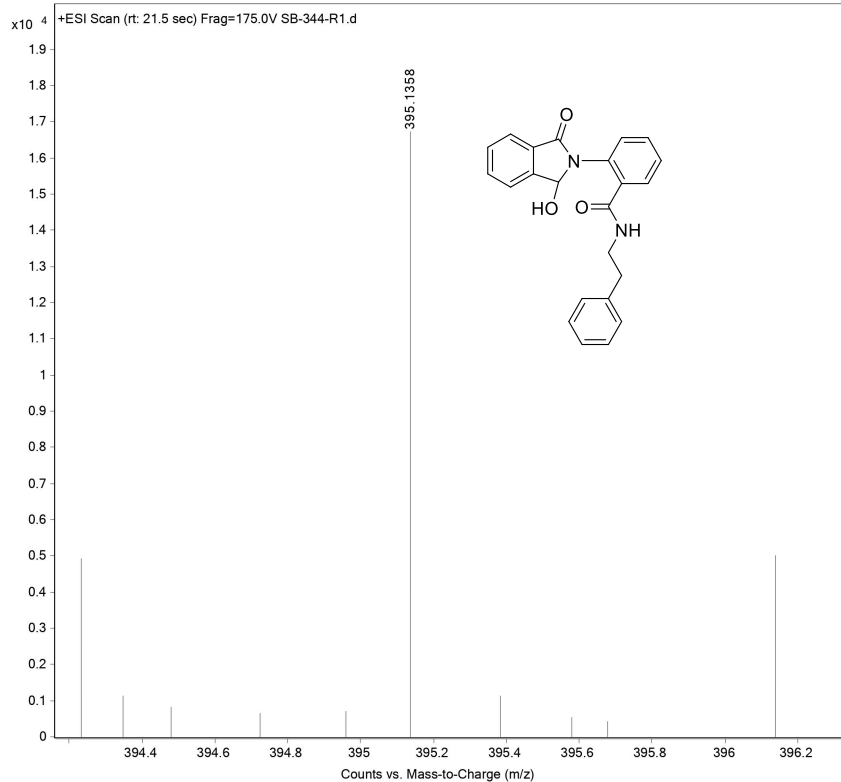

# HRMS spectrum of 1aa

|                    |                    |                               |         |                        |                                 |
|--------------------|--------------------|-------------------------------|---------|------------------------|---------------------------------|
| <b>Sample Name</b> | WASH               | <b>Position</b>               | P2-B2   | <b>Instrument Name</b> | Instrument 1                    |
| <b>User Name</b>   |                    | <b>Inj Vol</b>                | 20      | <b>InjPosition</b>     |                                 |
| <b>Sample Type</b> | Sample             | <b>IRM Calibration Status</b> | Success | <b>Data Filename</b>   | SB-364-R1.d                     |
| <b>ACQ Method</b>  | ESI ALS 100-1000.m | <b>Comment</b>                |         | <b>Acquired Time</b>   | 22-07-2021 16:51:29 (UTC+05:30) |

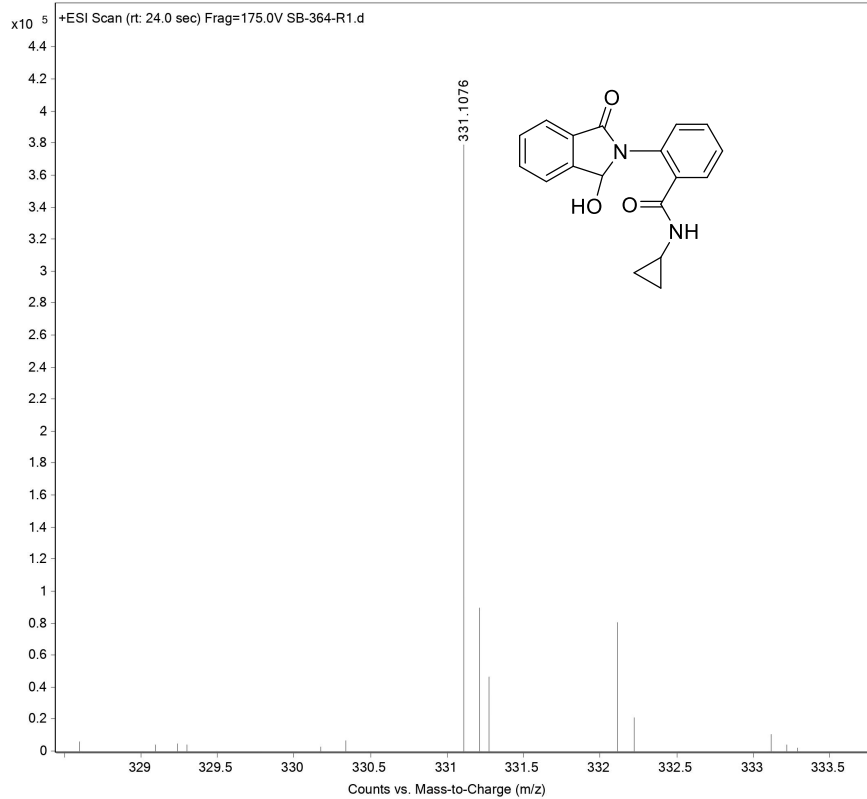



## HRMS spectrum of 2a

|                    |                   |                               |         |                        |                                  |
|--------------------|-------------------|-------------------------------|---------|------------------------|----------------------------------|
| <b>Sample Name</b> | SB-167            | <b>Position</b>               | P1-D2   | <b>Instrument Name</b> | Instrument 1                     |
| <b>User Name</b>   |                   | <b>Inj Vol</b>                | 20      | <b>InjPosition</b>     |                                  |
| <b>Sample Type</b> | Sample            | <b>IRM Calibration Status</b> | Success | <b>Data Filename</b>   | SB-167.d                         |
| <b>ACQ Method</b>  | ESI ALS 100-600.m | <b>Comment</b>                |         | <b>Acquired Time</b>   | 12/3/2020 3:45:42 PM (UTC+05:30) |

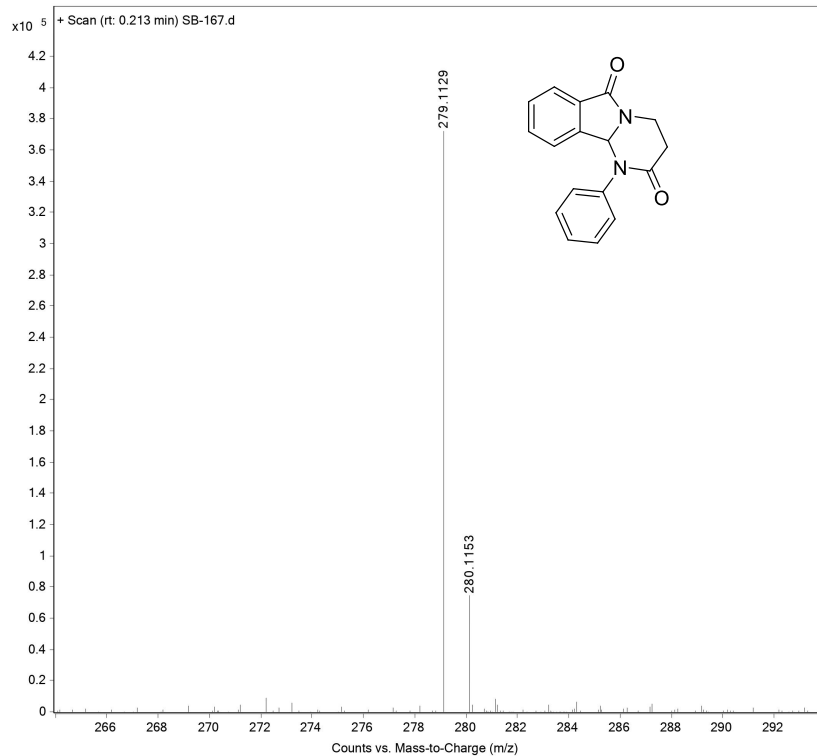

# HRMS spectrum of **2b**

|                    |                   |                               |         |                        |                                  |
|--------------------|-------------------|-------------------------------|---------|------------------------|----------------------------------|
| <b>Sample Name</b> | SB-204            | <b>Position</b>               | P1-C6   | <b>Instrument Name</b> | Instrument 1                     |
| <b>User Name</b>   |                   | <b>Inj Vol</b>                | 20      | <b>InjPosition</b>     |                                  |
| <b>Sample Type</b> | Sample            | <b>IRM Calibration Status</b> | Success | <b>Data Filename</b>   | SB-204.d                         |
| <b>ACQ Method</b>  | ESI ALS 100-600.m | <b>Comment</b>                |         | <b>Acquired Time</b>   | 12/3/2020 7:04:31 PM (UTC+05:30) |

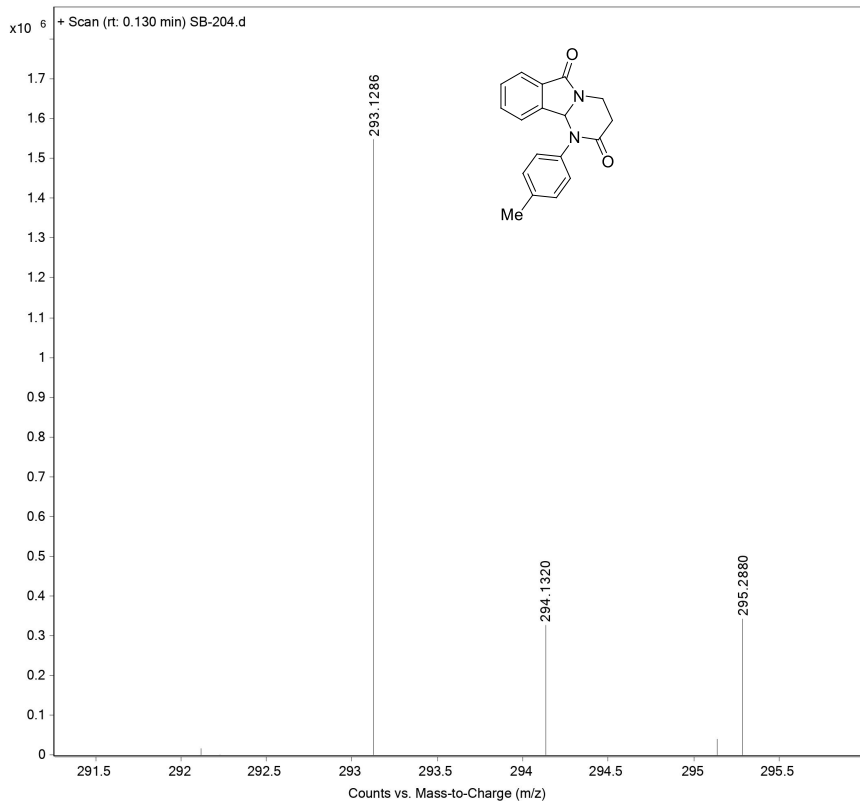

## HRMS spectrum of 2c

|                    |                   |                               |         |                        |                                  |
|--------------------|-------------------|-------------------------------|---------|------------------------|----------------------------------|
| <b>Sample Name</b> | SB-235            | <b>Position</b>               | P1-C3   | <b>Instrument Name</b> | Instrument 1                     |
| <b>User Name</b>   |                   | <b>Inj Vol</b>                | 20      | <b>InjPosition</b>     |                                  |
| <b>Sample Type</b> | Sample            | <b>IRM Calibration Status</b> | Success | <b>Data Filename</b>   | SB-235.d                         |
| <b>ACQ Method</b>  | ESI ALS 100-600.m | <b>Comment</b>                |         | <b>Acquired Time</b>   | 12/4/2020 1:02:54 PM (UTC+05:30) |

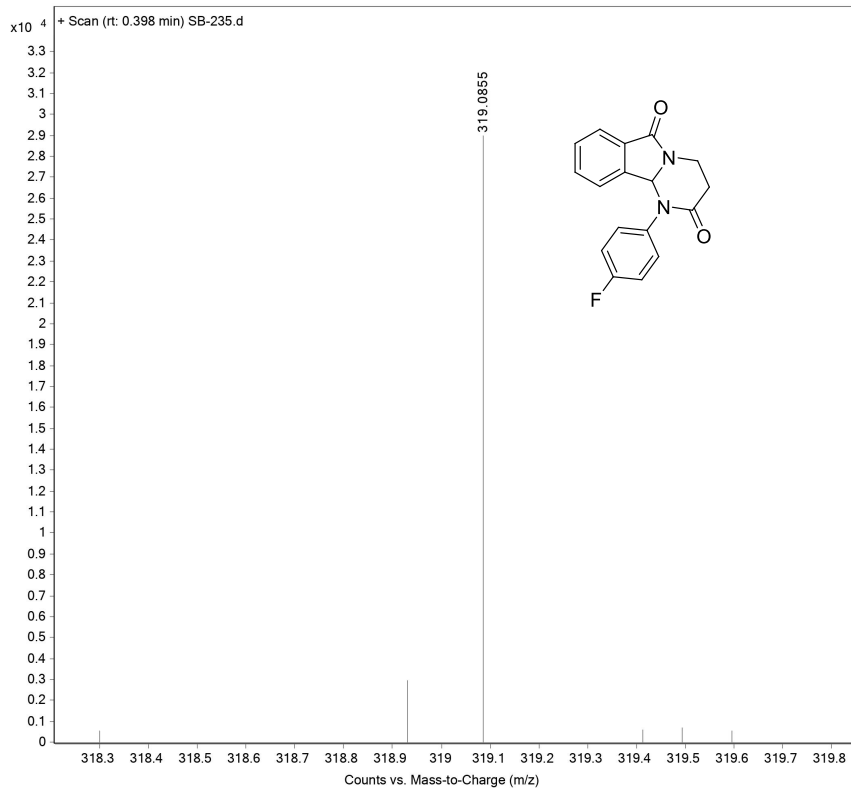

# HRMS spectrum of 2d

|                    |                   |                               |         |                        |                                  |
|--------------------|-------------------|-------------------------------|---------|------------------------|----------------------------------|
| <b>Sample Name</b> | SB-185            | <b>Position</b>               | P1-D4   | <b>Instrument Name</b> | Instrument 1                     |
| <b>User Name</b>   |                   | <b>Inj Vol</b>                | 20      | <b>InjPosition</b>     |                                  |
| <b>Sample Type</b> | Sample            | <b>IRM Calibration Status</b> | Success | <b>Data Filename</b>   | SB-185.d                         |
| <b>ACQ Method</b>  | ESI ALS 100-600.m | <b>Comment</b>                |         | <b>Acquired Time</b>   | 12/3/2020 3:49:28 PM (UTC+05:30) |

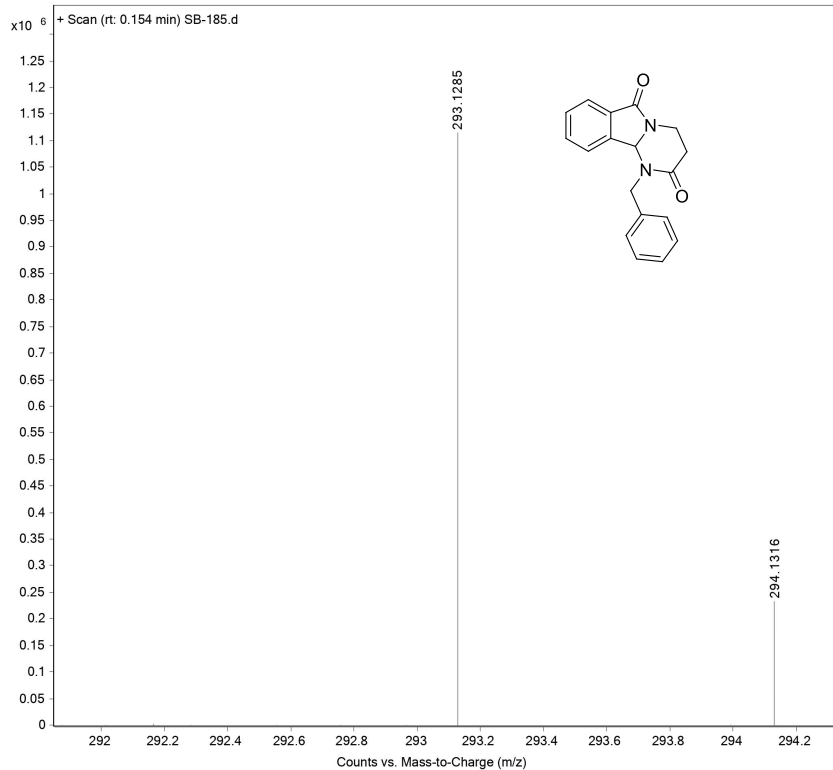

# HRMS spectrum of 2e

|                    |                    |                               |         |                        |                                  |
|--------------------|--------------------|-------------------------------|---------|------------------------|----------------------------------|
| <b>Sample Name</b> | SB-197             | <b>Position</b>               | P1-C2   | <b>Instrument Name</b> | Instrument 1                     |
| <b>User Name</b>   |                    | <b>Inj Vol</b>                | 20      | <b>InjPosition</b>     |                                  |
| <b>Sample Type</b> | Sample             | <b>IRM Calibration Status</b> | Success | <b>Data Filename</b>   | SB-197.d                         |
| <b>ACQ Method</b>  | ESI ALS 100-1000.m | <b>Comment</b>                |         | <b>Acquired Time</b>   | 12/3/2020 6:33:22 PM (UTC+05:30) |

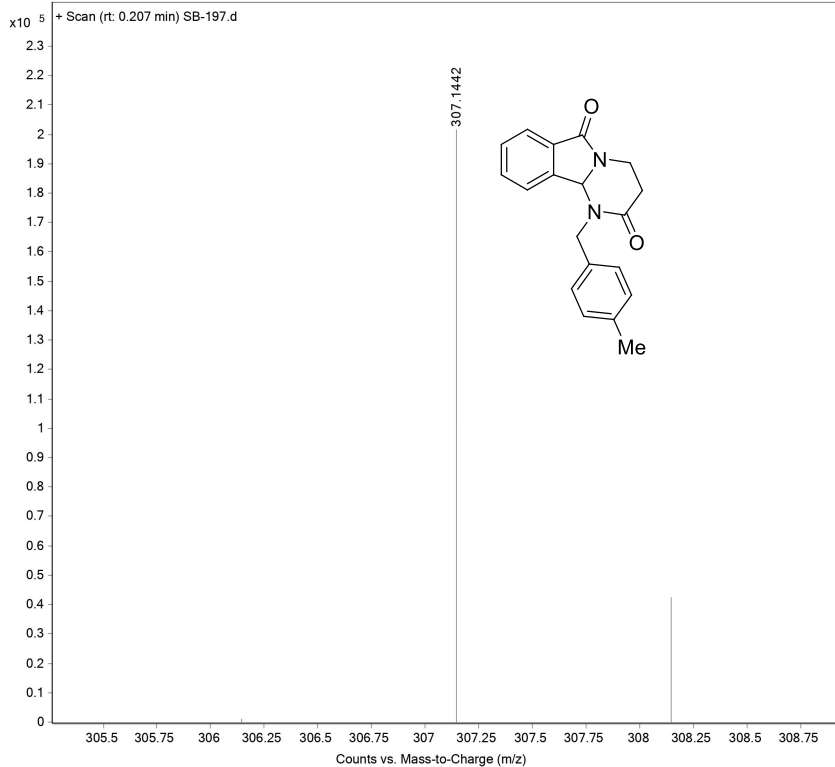

# HRMS spectrum of **2f**

|                    |                   |                               |         |                        |                                  |
|--------------------|-------------------|-------------------------------|---------|------------------------|----------------------------------|
| <b>Sample Name</b> | SB-206            | <b>Position</b>               | P1-C7   | <b>Instrument Name</b> | Instrument 1                     |
| <b>User Name</b>   |                   | <b>Inj Vol</b>                | 20      | <b>InjPosition</b>     |                                  |
| <b>Sample Type</b> | Sample            | <b>IRM Calibration Status</b> | Success | <b>Data Filename</b>   | SB-206.d                         |
| <b>ACQ Method</b>  | ESI ALS 100-600.m | <b>Comment</b>                |         | <b>Acquired Time</b>   | 12/3/2020 7:06:25 PM (UTC+05:30) |

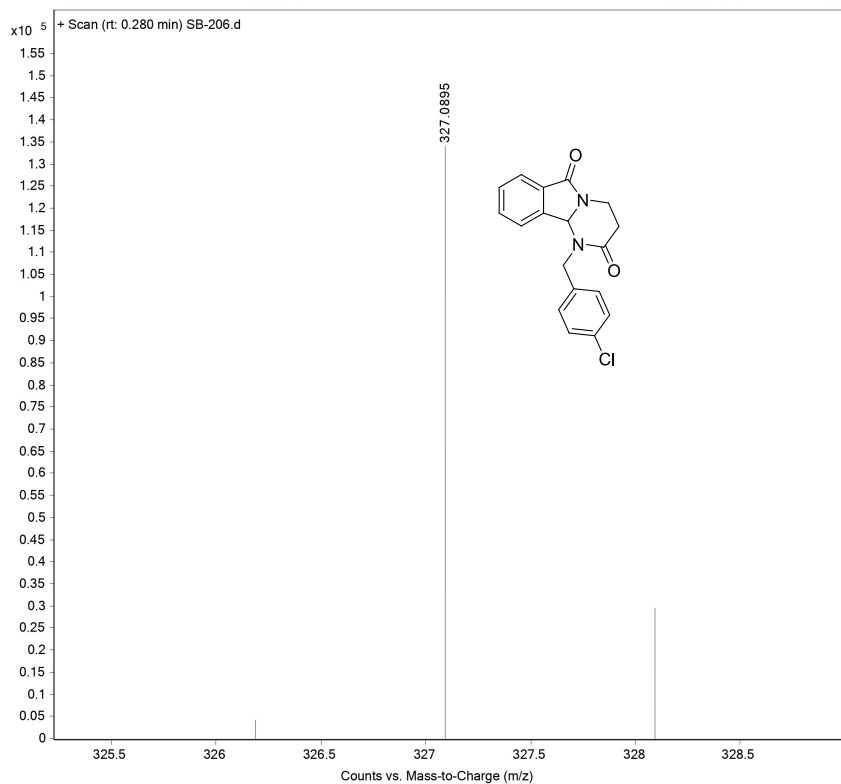

## HRMS spectrum of **2g**

|                    |                   |                               |         |                        |                                    |
|--------------------|-------------------|-------------------------------|---------|------------------------|------------------------------------|
| <b>Sample Name</b> | SAMPLE            | <b>Position</b>               | P1-B3   | <b>Instrument Name</b> | Instrument 1                       |
| <b>User Name</b>   |                   | <b>Inj Vol</b>                | 20      | <b>InjPosition</b>     |                                    |
| <b>Sample Type</b> | Sample            | <b>IRM Calibration Status</b> | Success | <b>Data Filename</b>   | SB-232.d                           |
| <b>ACQ Method</b>  | ESI ALS 150-600.m | <b>Comment</b>                |         | <b>Acquired Time</b>   | 12/11/2020 11:54:15 AM (UTC+05:30) |

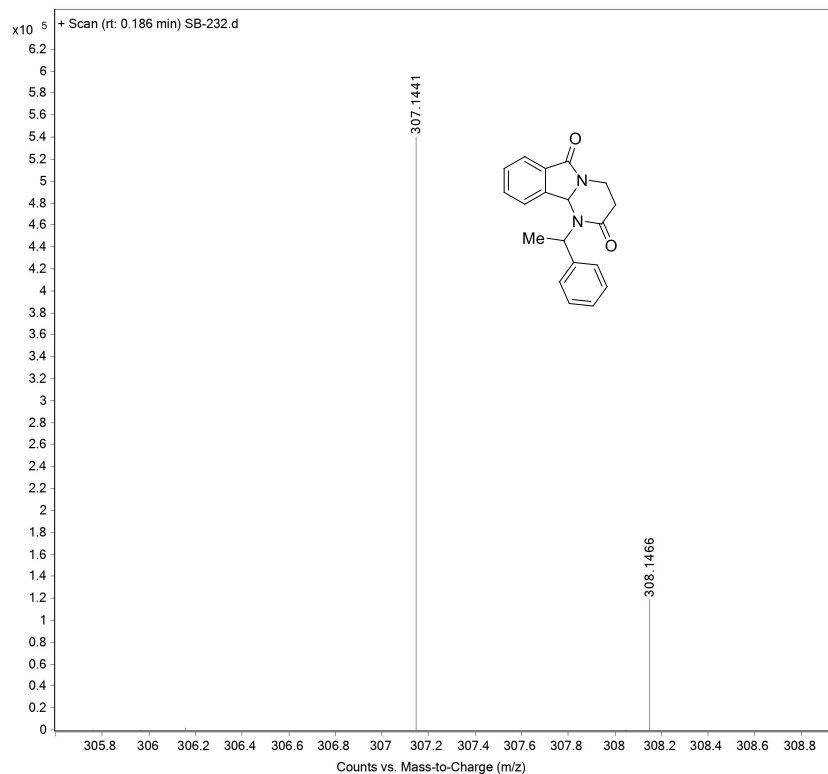

## HRMS spectrum of **2h**

|                    |                   |                               |         |                        |                                  |
|--------------------|-------------------|-------------------------------|---------|------------------------|----------------------------------|
| <b>Sample Name</b> | SB-233            | <b>Position</b>               | P1-C2   | <b>Instrument Name</b> | Instrument 1                     |
| <b>User Name</b>   |                   | <b>Inj Vol</b>                | 20      | <b>InjPosition</b>     |                                  |
| <b>Sample Type</b> | Sample            | <b>IRM Calibration Status</b> | Success | <b>Data Filename</b>   | SB-233.d                         |
| <b>ACQ Method</b>  | ESI ALS 100-600.m | <b>Comment</b>                |         | <b>Acquired Time</b>   | 12/3/2020 8:18:15 PM (UTC+05:30) |

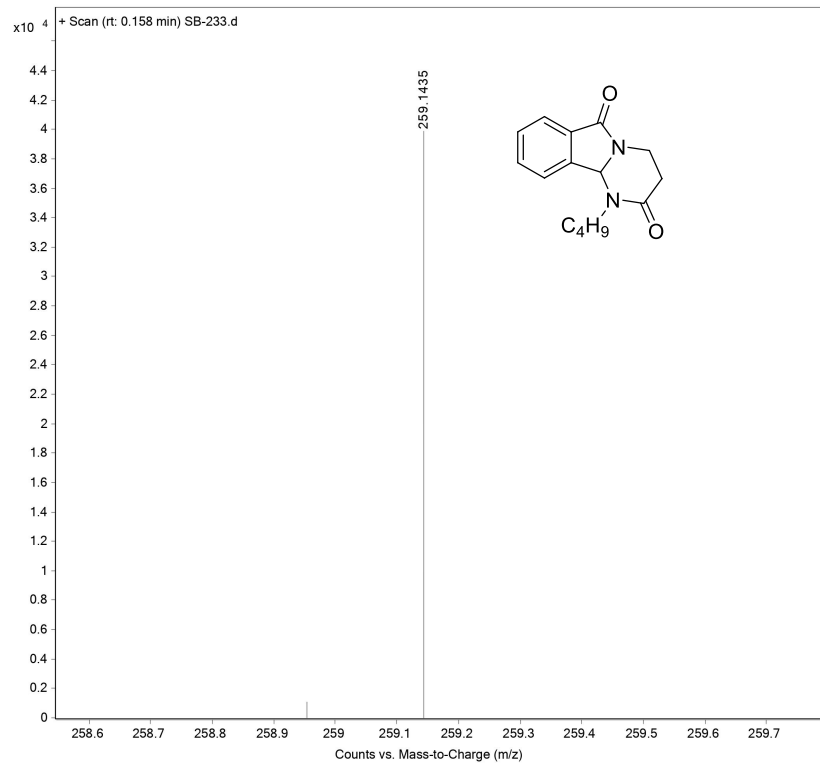



# HRMS spectrum of **2i**

|                    |                   |                               |         |                        |                                 |
|--------------------|-------------------|-------------------------------|---------|------------------------|---------------------------------|
| <b>Sample Name</b> | WASH              | <b>Position</b>               | P1-E1   | <b>Instrument Name</b> | Instrument 1                    |
| <b>User Name</b>   |                   | <b>Inj Vol</b>                | 20      | <b>InjPosition</b>     |                                 |
| <b>Sample Type</b> | Sample            | <b>IRM Calibration Status</b> | Success | <b>Data Filename</b>   | SB-255.d                        |
| <b>ACQ Method</b>  | ESI ALS 100-600.m | <b>Comment</b>                |         | <b>Acquired Time</b>   | 1/7/2021 7:00:27 PM (UTC+05:30) |

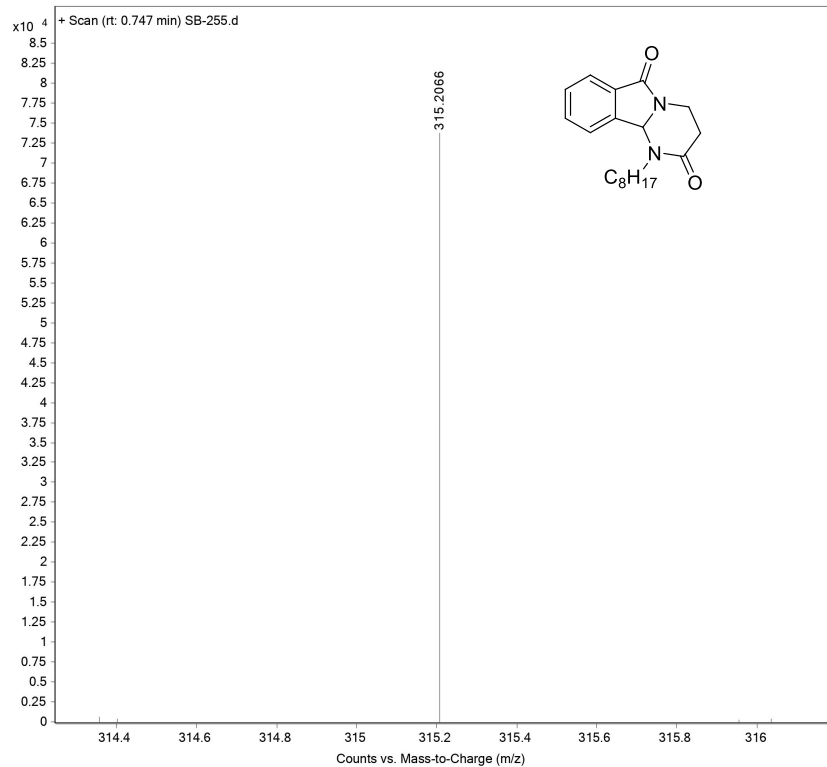

## HRMS spectrum of **2j**

|                    |                   |                               |         |                        |                                   |
|--------------------|-------------------|-------------------------------|---------|------------------------|-----------------------------------|
| <b>Sample Name</b> | SB-244            | <b>Position</b>               | P1-E1   | <b>Instrument Name</b> | Instrument 1                      |
| <b>User Name</b>   |                   | <b>Inj Vol</b>                | 20      | <b>InjPosition</b>     |                                   |
| <b>Sample Type</b> | Sample            | <b>IRM Calibration Status</b> | Success | <b>Data Filename</b>   | SB-244-r001.d                     |
| <b>ACQ Method</b>  | ESI ALS 100-600.m | <b>Comment</b>                |         | <b>Acquired Time</b>   | 12/23/2020 4:06:37 PM (UTC+05:30) |

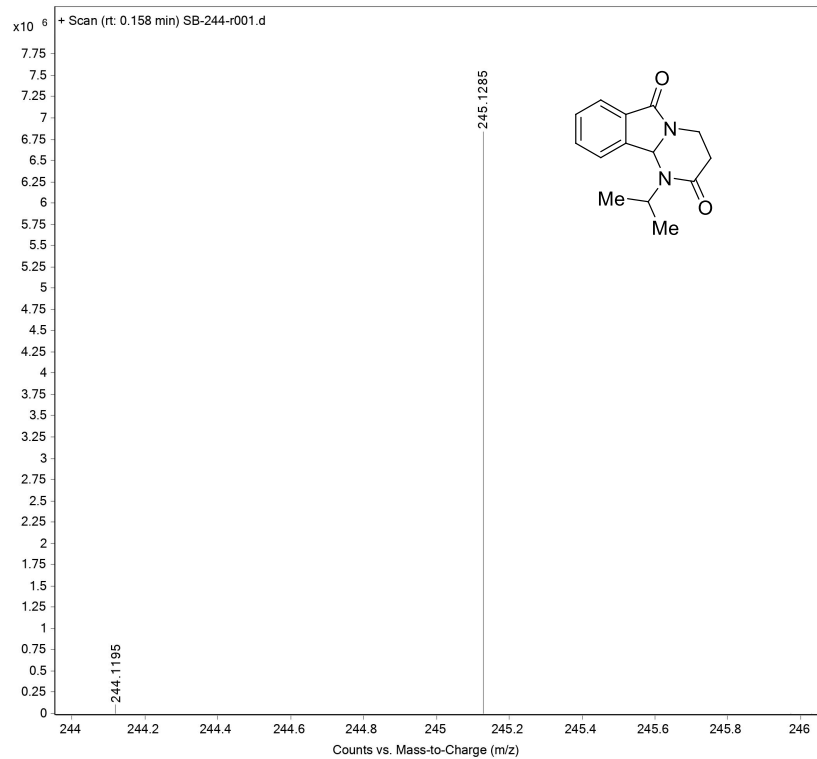

# HRMS spectrum of 2k

|                    |                    |                               |         |                        |                                 |
|--------------------|--------------------|-------------------------------|---------|------------------------|---------------------------------|
| <b>Sample Name</b> | WASH               | <b>Position</b>               | P1-E2   | <b>Instrument Name</b> | Instrument 1                    |
| <b>User Name</b>   |                    | <b>Inj Vol</b>                | 20      | <b>InjPosition</b>     |                                 |
| <b>Sample Type</b> | Sample             | <b>IRM Calibration Status</b> | Success | <b>Data Filename</b>   | SB-245.d                        |
| <b>ACQ Method</b>  | ESI ALS 100-1000.m | <b>Comment</b>                |         | <b>Acquired Time</b>   | 1/7/2021 6:47:45 PM (UTC+05:30) |

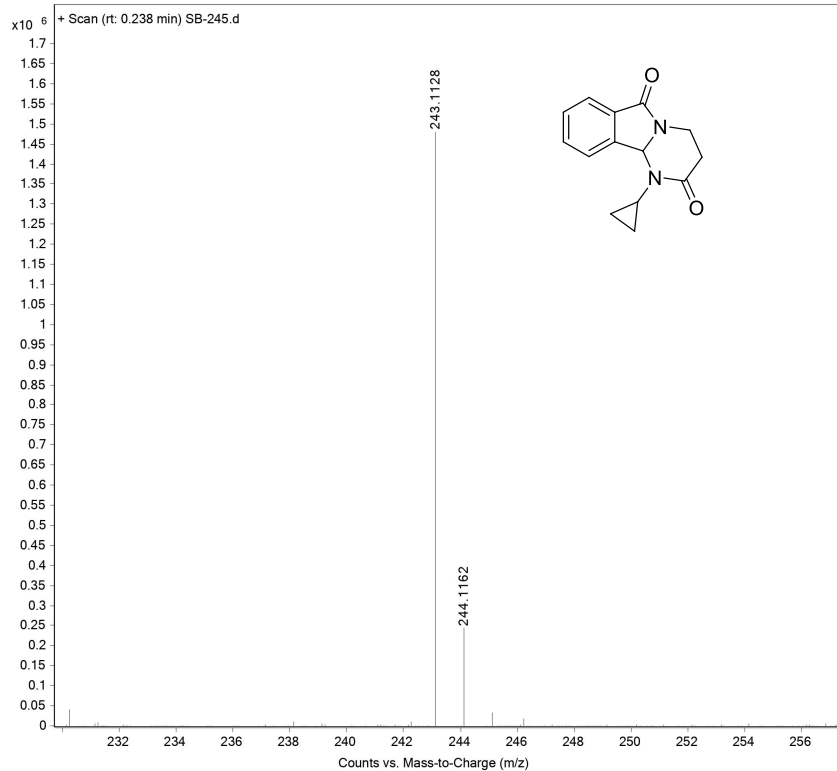

# HRMS spectrum of **2l**

|                    |                    |                               |         |                        |                                 |
|--------------------|--------------------|-------------------------------|---------|------------------------|---------------------------------|
| <b>Sample Name</b> | WASH               | <b>Position</b>               | P1-E1   | <b>Instrument Name</b> | Instrument 1                    |
| <b>User Name</b>   |                    | <b>Inj Vol</b>                | 20      | <b>InjPosition</b>     |                                 |
| <b>Sample Type</b> | Sample             | <b>IRM Calibration Status</b> | Success | <b>Data Filename</b>   | SB-205.d                        |
| <b>ACQ Method</b>  | ESI ALS 100-1000.m | <b>Comment</b>                |         | <b>Acquired Time</b>   | 1/7/2021 6:38:10 PM (UTC+05:30) |

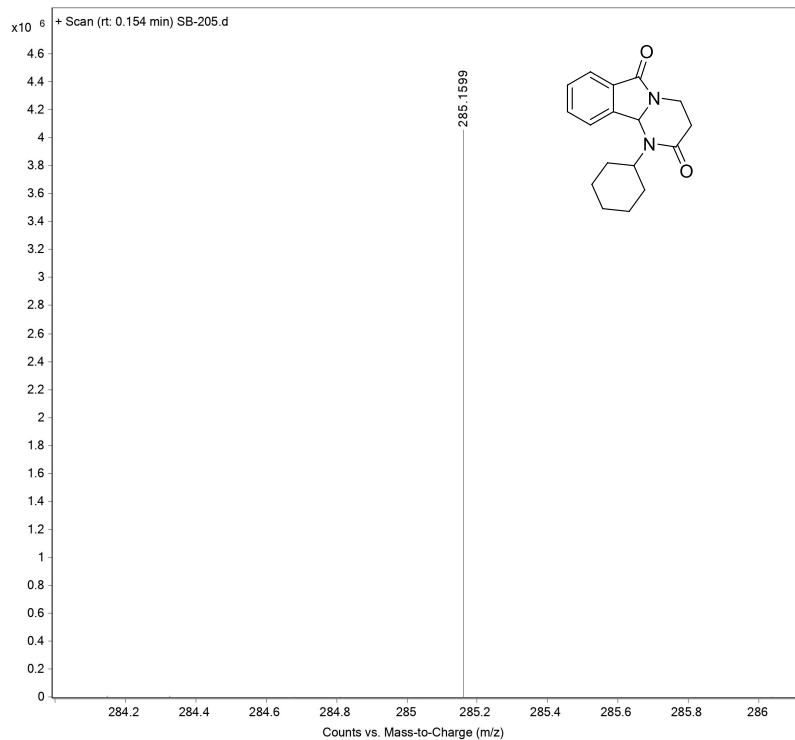

## HRMS spectrum of 2m

|                    |                   |                               |         |                        |                                   |
|--------------------|-------------------|-------------------------------|---------|------------------------|-----------------------------------|
| <b>Sample Name</b> | SB-248            | <b>Position</b>               | P1-E3   | <b>Instrument Name</b> | Instrument 1                      |
| <b>User Name</b>   |                   | <b>Inj Vol</b>                | 20      | <b>InjPosition</b>     |                                   |
| <b>Sample Type</b> | Sample            | <b>IRM Calibration Status</b> | Success | <b>Data Filename</b>   | SB-248.d                          |
| <b>ACQ Method</b>  | ESI ALS 100-600.m | <b>Comment</b>                |         | <b>Acquired Time</b>   | 12/23/2020 4:10:23 PM (UTC+05:30) |

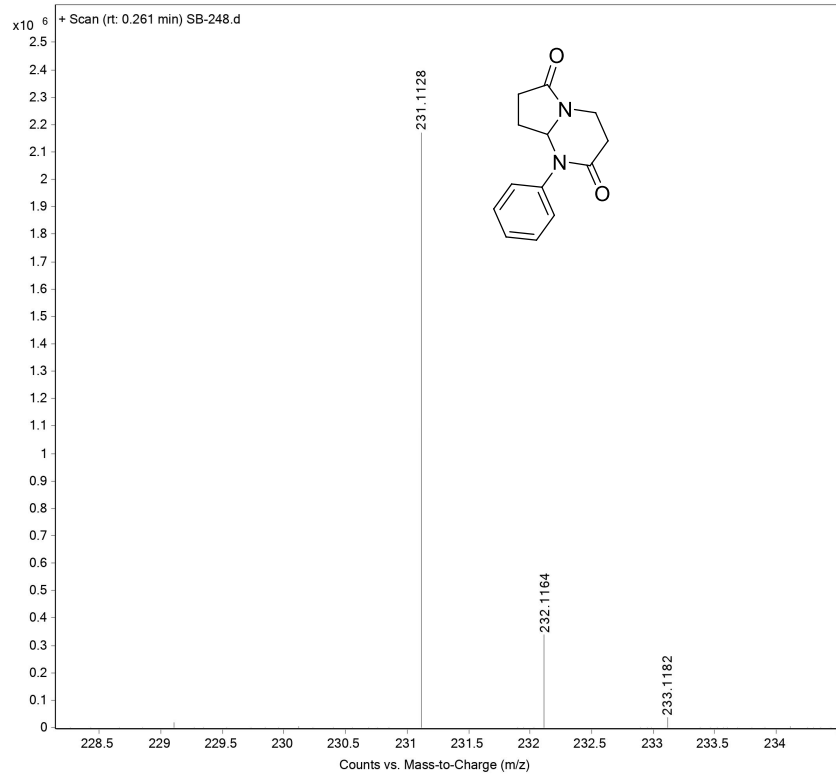

# HRMS spectrum of 2n

|                    |                   |                               |         |                        |                                  |
|--------------------|-------------------|-------------------------------|---------|------------------------|----------------------------------|
| <b>Sample Name</b> | SAMPLE            | <b>Position</b>               | P1-B3   | <b>Instrument Name</b> | Instrument 1                     |
| <b>User Name</b>   |                   | <b>Inj Vol</b>                | 20      | <b>InjPosition</b>     |                                  |
| <b>Sample Type</b> | Sample            | <b>IRM Calibration Status</b> | Success | <b>Data Filename</b>   | SB-269.d                         |
| <b>ACQ Method</b>  | ESI ALS 100-700.m | <b>Comment</b>                |         | <b>Acquired Time</b>   | 1/21/2021 6:02:00 PM (UTC+05:30) |

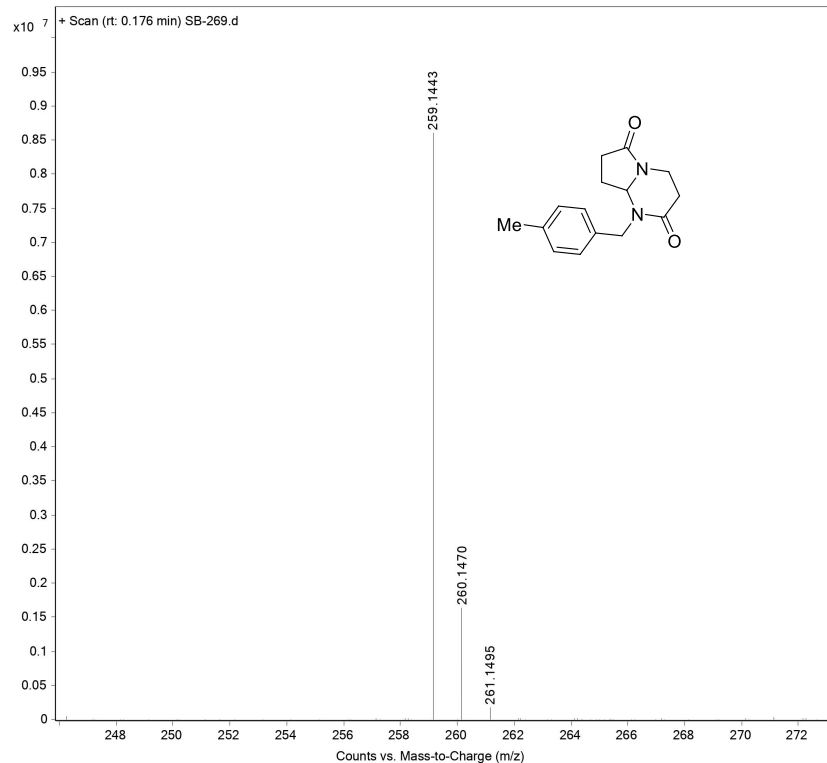

## HRMS spectrum of **2o**

|                    |                   |                               |         |                        |                                  |
|--------------------|-------------------|-------------------------------|---------|------------------------|----------------------------------|
| <b>Sample Name</b> | SB-282-R2         | <b>Position</b>               | P2-B2   | <b>Instrument Name</b> | Instrument 1                     |
| <b>User Name</b>   |                   | <b>Inj Vol</b>                | 20      | <b>InjPosition</b>     |                                  |
| <b>Sample Type</b> | Sample            | <b>IRM Calibration Status</b> | Success | <b>Data Filename</b>   | SB-282-R2.d                      |
| <b>ACQ Method</b>  | ESI ALS 100-600.m | <b>Comment</b>                |         | <b>Acquired Time</b>   | 2/16/2021 7:25:34 PM (UTC+05:30) |

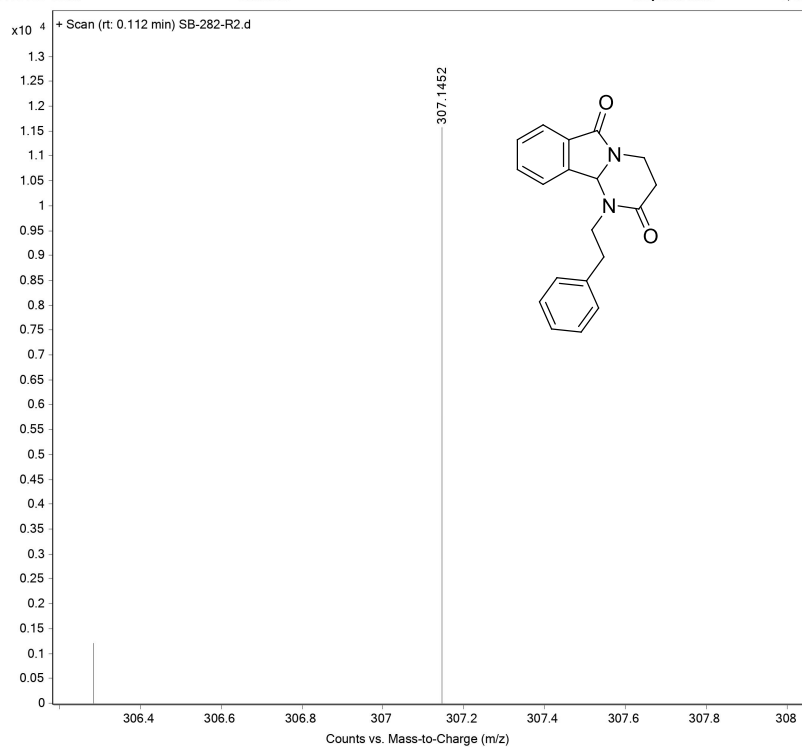

# HRMS spectrum of 2p

|                    |                   |                               |         |                        |                                  |
|--------------------|-------------------|-------------------------------|---------|------------------------|----------------------------------|
| <b>Sample Name</b> | SAMPLE            | <b>Position</b>               | P1-C10  | <b>Instrument Name</b> | Instrument 1                     |
| <b>User Name</b>   |                   | <b>Inj Vol</b>                | 20      | <b>InjPosition</b>     |                                  |
| <b>Sample Type</b> | Sample            | <b>IRM Calibration Status</b> | Success | <b>Data Filename</b>   | SB-295.d                         |
| <b>ACQ Method</b>  | ESI ALS 100-600.m | <b>Comment</b>                |         | <b>Acquired Time</b>   | 3/4/2021 12:23:59 PM (UTC+05:30) |

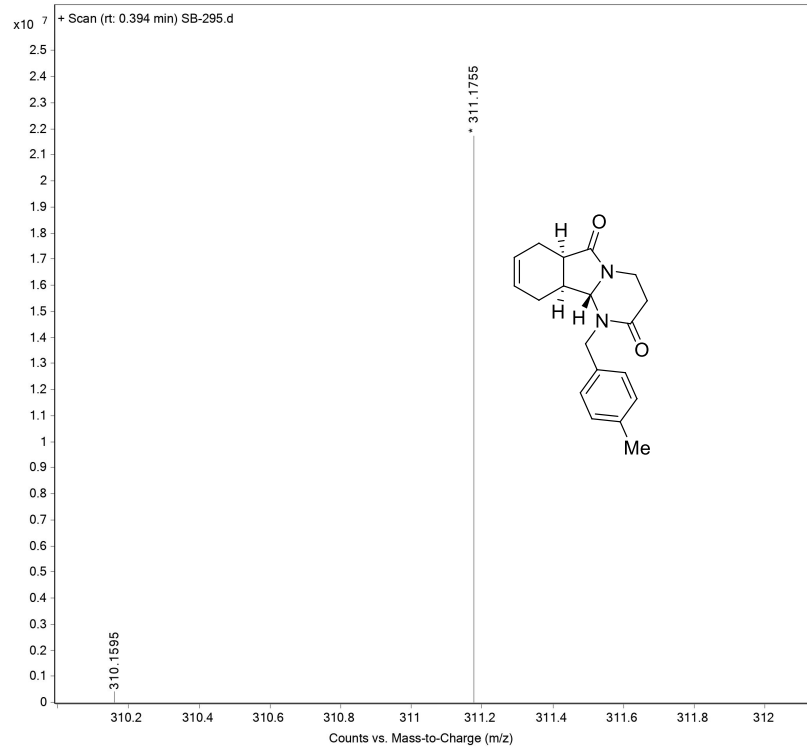



# HRMS spectrum of 2q

|                    |                    |                               |         |                        |                                  |
|--------------------|--------------------|-------------------------------|---------|------------------------|----------------------------------|
| <b>Sample Name</b> | SAMPLE 7           | <b>Position</b>               | P2-A8   | <b>Instrument Name</b> | Instrument 1                     |
| <b>User Name</b>   |                    | <b>Inj Vol</b>                | 20      | <b>InjPosition</b>     |                                  |
| <b>Sample Type</b> | Sample             | <b>IRM Calibration Status</b> | Success | <b>Data Filename</b>   | SB-302.d                         |
| <b>ACQ Method</b>  | ESI ALS 100-1000.m | <b>Comment</b>                |         | <b>Acquired Time</b>   | 3/12/2021 7:50:29 PM (UTC+05:30) |

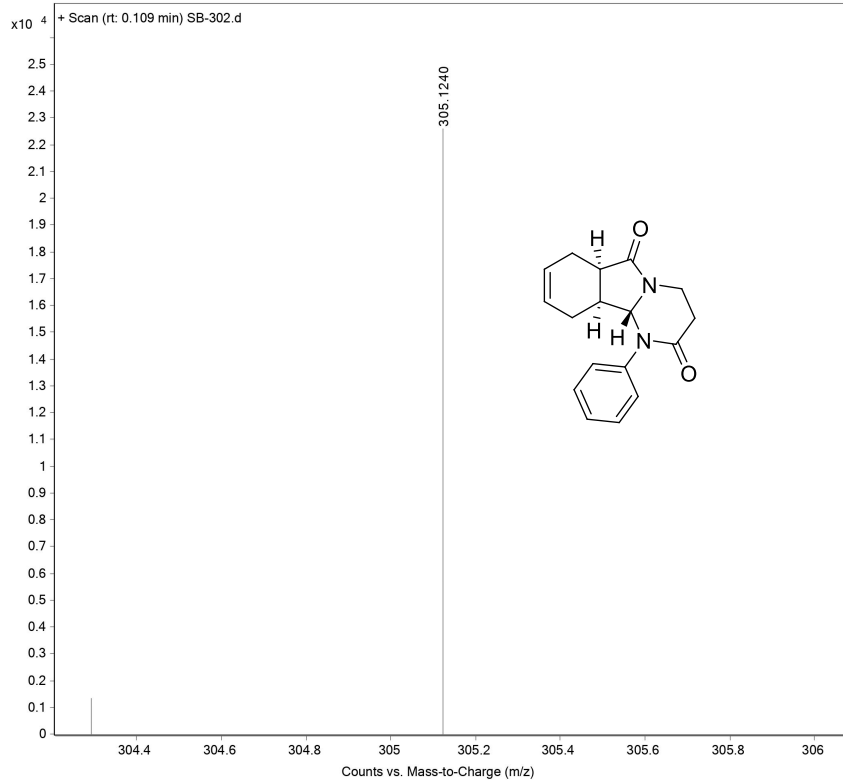

# HRMS spectrum of **2r**

|                    |                   |                               |         |                        |                                  |
|--------------------|-------------------|-------------------------------|---------|------------------------|----------------------------------|
| <b>Sample Name</b> | SAMPLE            | <b>Position</b>               | P1-C11  | <b>Instrument Name</b> | Instrument 1                     |
| <b>User Name</b>   |                   | <b>Inj Vol</b>                | 20      | <b>InjPosition</b>     |                                  |
| <b>Sample Type</b> | Sample            | <b>IRM Calibration Status</b> | Success | <b>Data Filename</b>   | SB-297.d                         |
| <b>ACQ Method</b>  | ESI ALS 100-600.m | <b>Comment</b>                |         | <b>Acquired Time</b>   | 3/4/2021 12:25:50 PM (UTC+05:30) |

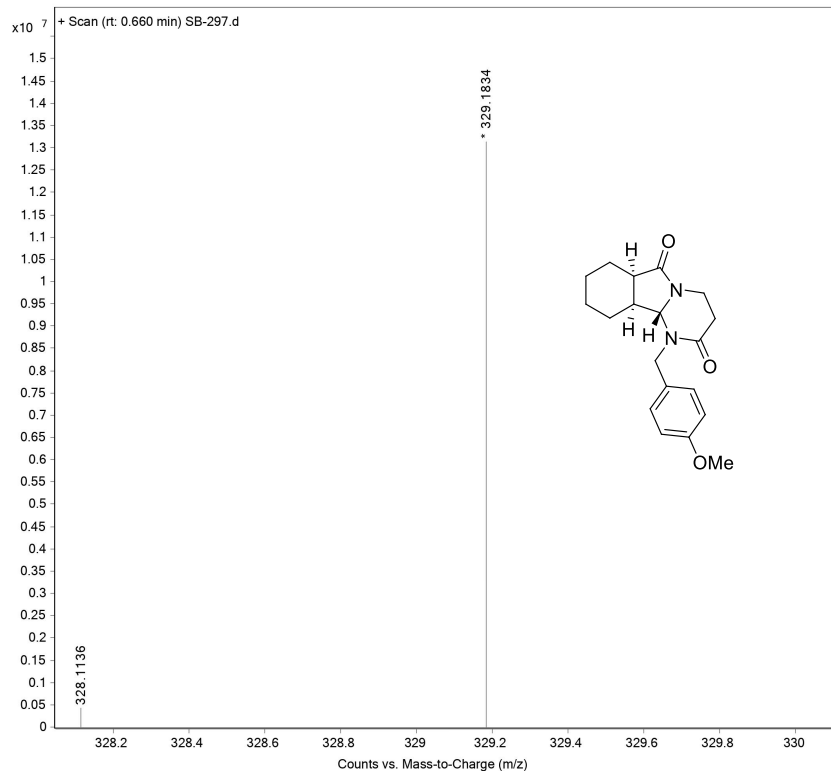

## HRMS spectrum of **2s**

|                    |                    |                               |         |                        |                                 |
|--------------------|--------------------|-------------------------------|---------|------------------------|---------------------------------|
| <b>Sample Name</b> | SAMPLE 6           | <b>Position</b>               | P2-A7   | <b>Instrument Name</b> | Instrument 1                    |
| <b>User Name</b>   |                    | <b>Inj Vol</b>                | 20      | <b>InjPosition</b>     |                                 |
| <b>Sample Type</b> | Sample             | <b>IRM Calibration Status</b> | Success | <b>Data Filename</b>   | SB-301.d                        |
| <b>ACQ Method</b>  | ESI ALS 100-1000.m | <b>Comment</b>                |         | <b>Acquired Time</b>   | 12-03-2021 19:39:19 (UTC+05:30) |

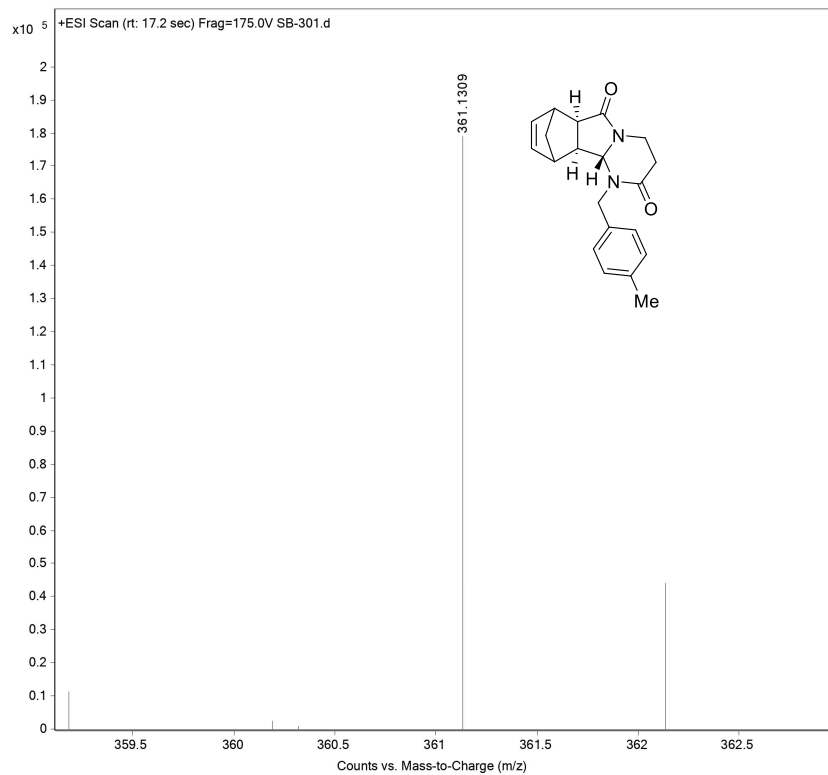

# HRMS spectrum of **2u**

|                    |                   |                               |         |                        |                                 |
|--------------------|-------------------|-------------------------------|---------|------------------------|---------------------------------|
| <b>Sample Name</b> | SAMPLE 2          | <b>Position</b>               | P2-B7   | <b>Instrument Name</b> | Instrument 1                    |
| <b>User Name</b>   |                   | <b>Inj Vol</b>                | 20      | <b>InjPosition</b>     |                                 |
| <b>Sample Type</b> | Sample            | <b>IRM Calibration Status</b> | Success | <b>Data Filename</b>   | SB-321.d                        |
| <b>ACQ Method</b>  | ESI ALS 100-600.m | <b>Comment</b>                |         | <b>Acquired Time</b>   | 26-04-2021 16:04:22 (UTC+05:30) |

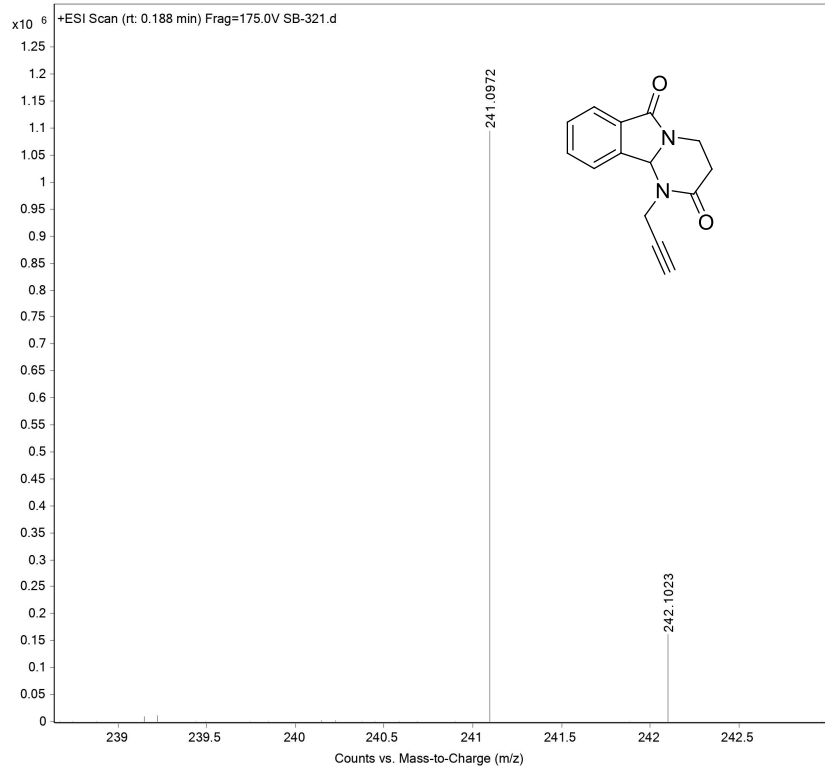

# HRMS spectrum of **2v**

|                    |                    |                               |         |                        |                                 |
|--------------------|--------------------|-------------------------------|---------|------------------------|---------------------------------|
| <b>Sample Name</b> | WASH               | <b>Position</b>               | P2-B5   | <b>Instrument Name</b> | Instrument 1                    |
| <b>User Name</b>   |                    | <b>Inj Vol</b>                | 20      | <b>InjPosition</b>     |                                 |
| <b>Sample Type</b> | Sample             | <b>IRM Calibration Status</b> | Success | <b>Data Filename</b>   | SB-382.d                        |
| <b>ACQ Method</b>  | ESI ALS 100-1000.m | <b>Comment</b>                |         | <b>Acquired Time</b>   | 05-08-2021 18:28:16 (UTC+05:30) |

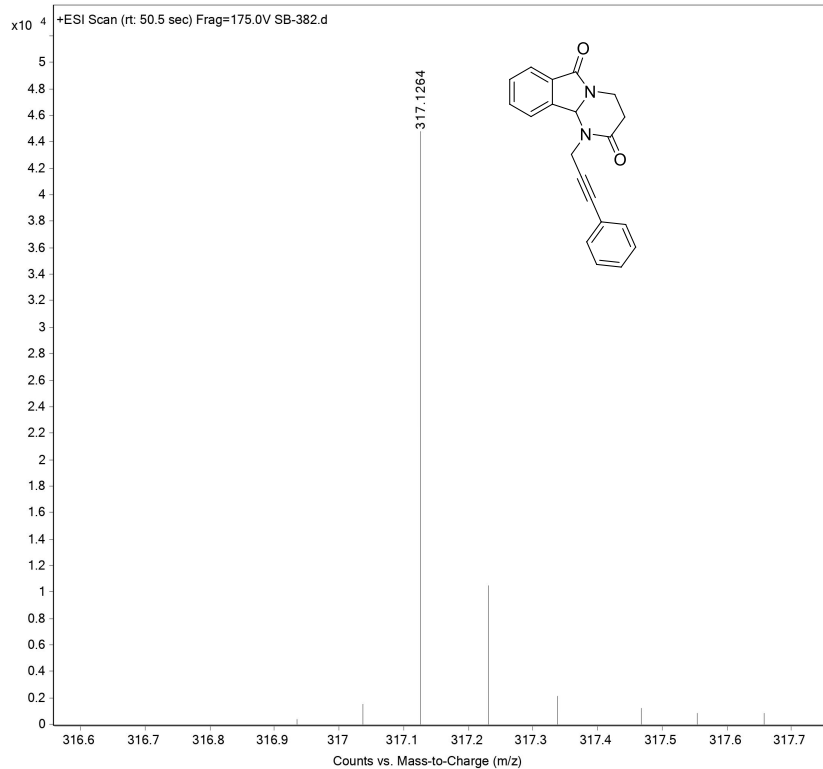

# HRMS spectrum of **2w**

|                    |                   |                               |         |                        |                                  |
|--------------------|-------------------|-------------------------------|---------|------------------------|----------------------------------|
| <b>Sample Name</b> | SB-229            | <b>Position</b>               | P1-C1   | <b>Instrument Name</b> | Instrument 1                     |
| <b>User Name</b>   |                   | <b>Inj Vol</b>                | 20      | <b>InjPosition</b>     |                                  |
| <b>Sample Type</b> | Sample            | <b>IRM Calibration Status</b> | Success | <b>Data Filename</b>   | SB-229.d                         |
| <b>ACQ Method</b>  | ESI ALS 100-600.m | <b>Comment</b>                |         | <b>Acquired Time</b>   | 12/3/2020 8:16:23 PM (UTC+05:30) |

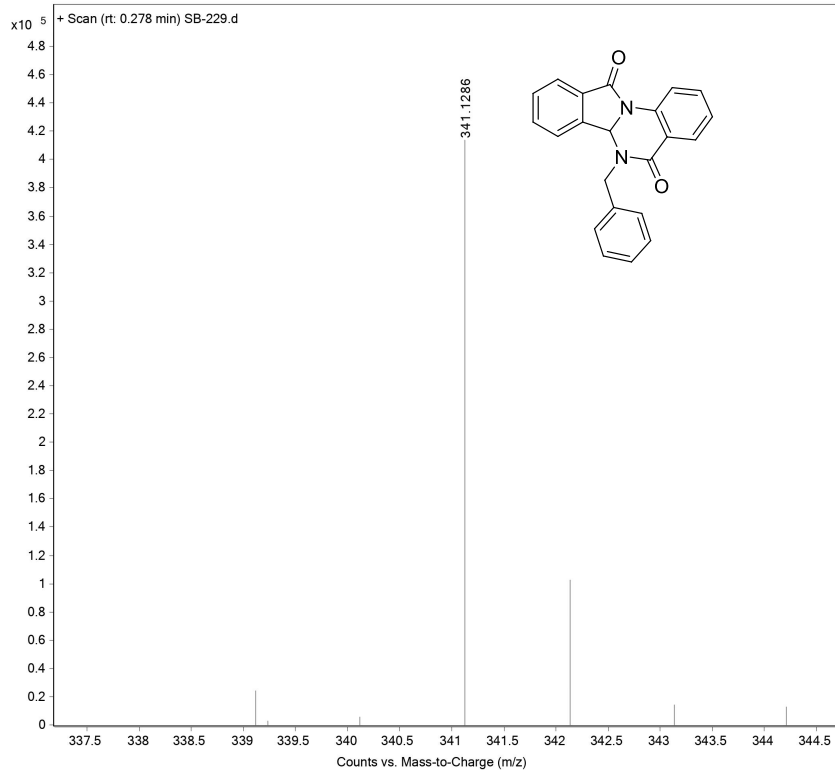

# HRMS spectrum of 2x

|                    |                    |                               |         |                        |                                  |
|--------------------|--------------------|-------------------------------|---------|------------------------|----------------------------------|
| <b>Sample Name</b> | SAMPLE             | <b>Position</b>               | P1-C8   | <b>Instrument Name</b> | Instrument 1                     |
| <b>User Name</b>   |                    | <b>Inj Vol</b>                | 20      | <b>InjPosition</b>     |                                  |
| <b>Sample Type</b> | Sample             | <b>IRM Calibration Status</b> | Success | <b>Data Filename</b>   | SB-288.d                         |
| <b>ACQ Method</b>  | ESI ALS 100-1000.m | <b>Comment</b>                |         | <b>Acquired Time</b>   | 3/4/2021 12:20:07 PM (UTC+05:30) |

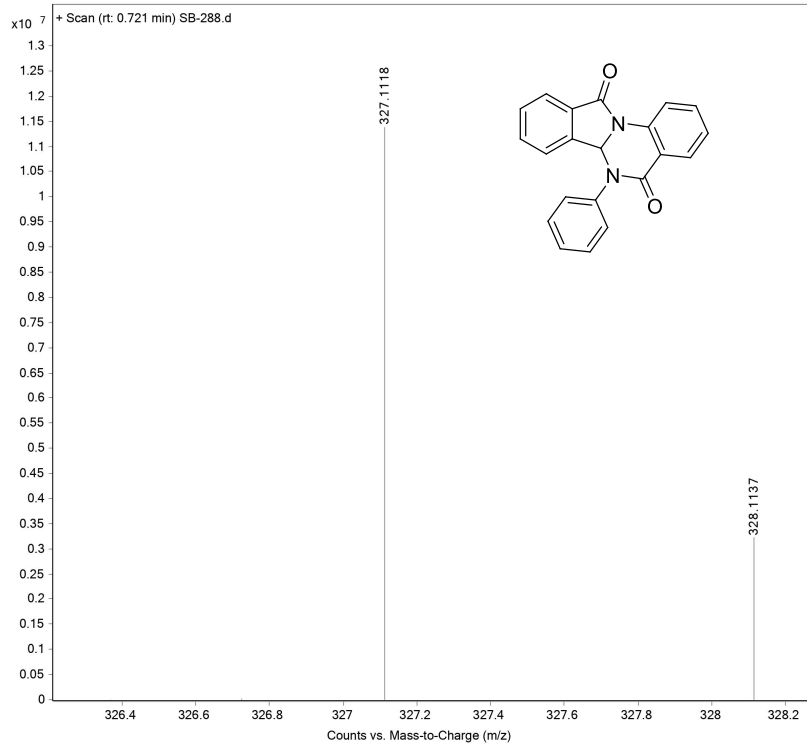

# HRMS spectrum of **2y**

|                    |                   |                               |         |                        |                                  |
|--------------------|-------------------|-------------------------------|---------|------------------------|----------------------------------|
| <b>Sample Name</b> | SAMPLE            | <b>Position</b>               | P1-C9   | <b>Instrument Name</b> | Instrument 1                     |
| <b>User Name</b>   |                   | <b>Inj Vol</b>                | 20      | <b>InjPosition</b>     |                                  |
| <b>Sample Type</b> | Sample            | <b>IRM Calibration Status</b> | Success | <b>Data Filename</b>   | SB-289.d                         |
| <b>ACQ Method</b>  | ESI ALS 100-600.m | <b>Comment</b>                |         | <b>Acquired Time</b>   | 3/4/2021 12:22:06 PM (UTC+05:30) |

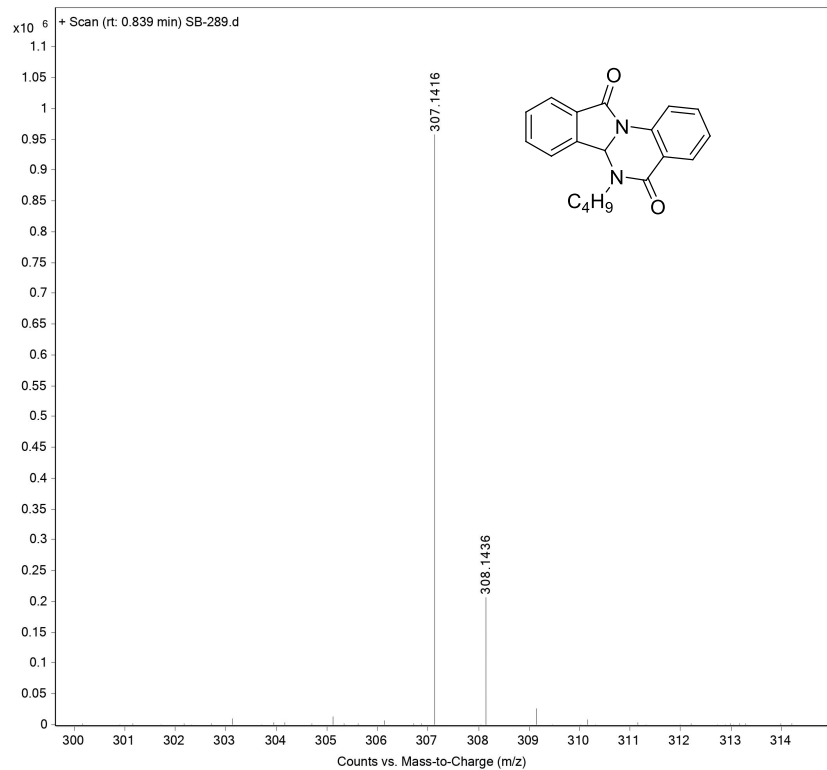



## HRMS spectrum of **2z**

|                    |                    |                               |         |                        |                                 |
|--------------------|--------------------|-------------------------------|---------|------------------------|---------------------------------|
| <b>Sample Name</b> | WASH               | <b>Position</b>               | P2-A9   | <b>Instrument Name</b> | Instrument 1                    |
| <b>User Name</b>   |                    | <b>Inj Vol</b>                | 20      | <b>Inj Position</b>    |                                 |
| <b>Sample Type</b> | Sample             | <b>IRM Calibration Status</b> | Success | <b>Data Filename</b>   | SB-345-R1.d                     |
| <b>ACQ Method</b>  | ESI ALS 100-1000.m | <b>Comment</b>                |         | <b>Acquired Time</b>   | 22-07-2021 16:46:04 (UTC+05:30) |

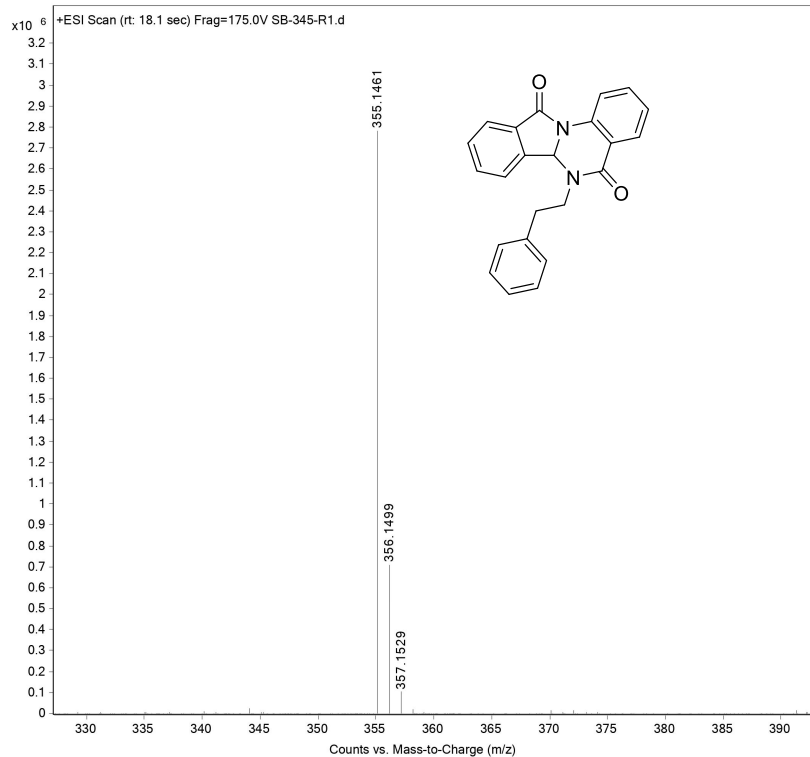

## HRMS spectrum of 2aa

|                    |                    |                               |         |                        |                                 |
|--------------------|--------------------|-------------------------------|---------|------------------------|---------------------------------|
| <b>Sample Name</b> | WASH               | <b>Position</b>               | P2-B3   | <b>Instrument Name</b> | Instrument 1                    |
| <b>User Name</b>   |                    | <b>Inj Vol</b>                | 20      | <b>InjPosition</b>     |                                 |
| <b>Sample Type</b> | Sample             | <b>IRM Calibration Status</b> | Success | <b>Data Filename</b>   | SB-365-R1.d                     |
| <b>ACQ Method</b>  | ESI ALS 100-1000.m | <b>Comment</b>                |         | <b>Acquired Time</b>   | 22-07-2021 16:53:17 (UTC+05:30) |

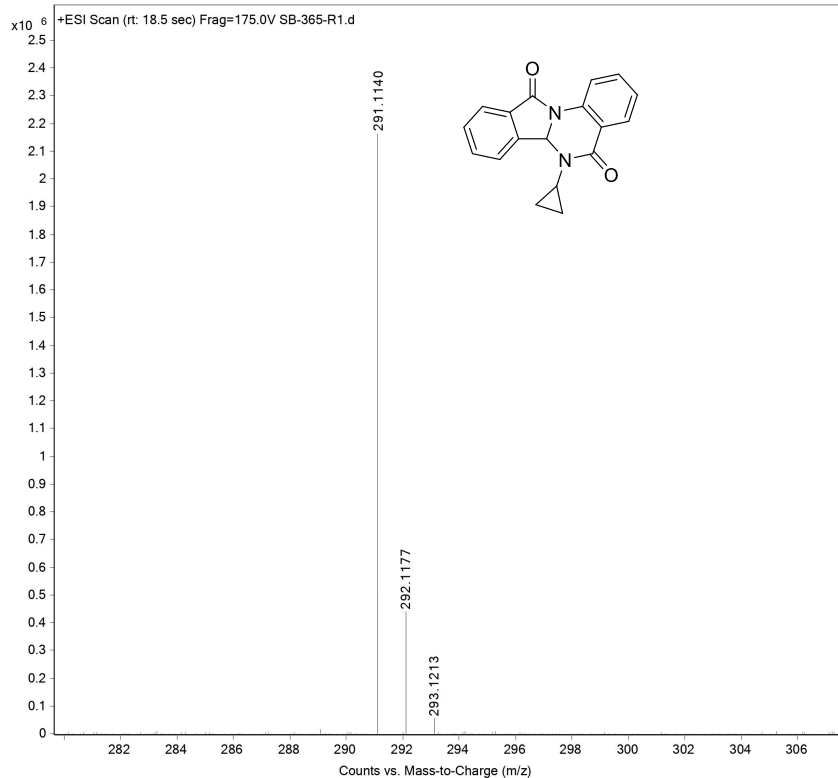

# HRMS spectrum of 3a

|                    |                   |                               |         |                        |                                 |
|--------------------|-------------------|-------------------------------|---------|------------------------|---------------------------------|
| <b>Sample Name</b> | SAMPLE 9          | <b>Position</b>               | P2-A10  | <b>Instrument Name</b> | Instrument 1                    |
| <b>User Name</b>   |                   | <b>Inj Vol</b>                | 20      | <b>InjPosition</b>     |                                 |
| <b>Sample Type</b> | Sample            | <b>IRM Calibration Status</b> | Success | <b>Data Filename</b>   | SB-324-R.d                      |
| <b>ACQ Method</b>  | ESI ALS 150-600.m | <b>Comment</b>                |         | <b>Acquired Time</b>   | 03-05-2021 17:16:06 (UTC+05:30) |

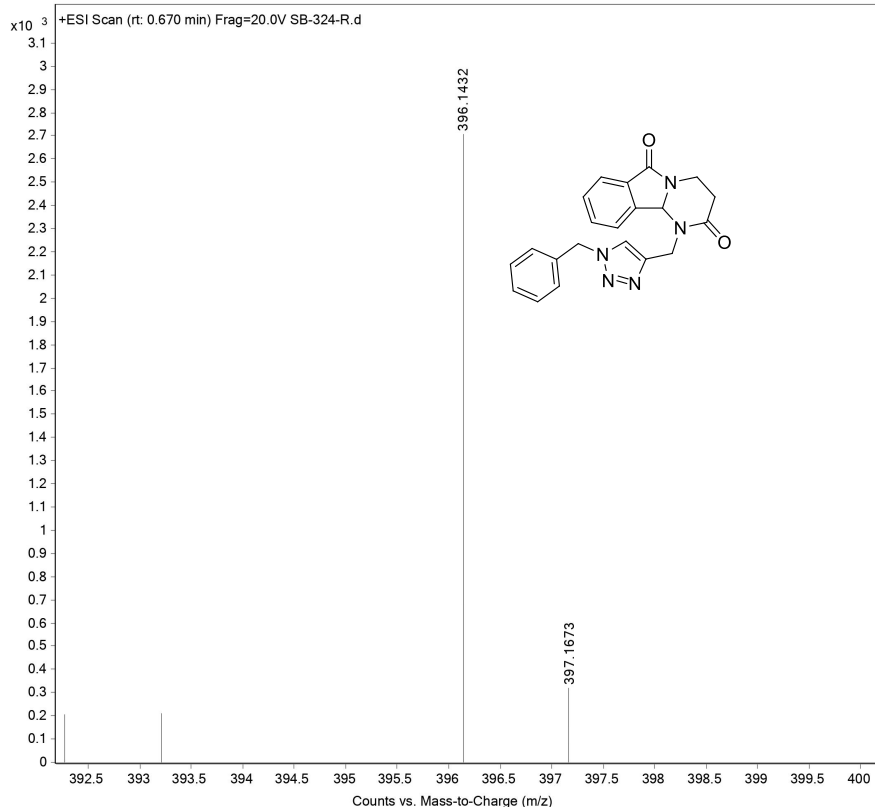

# HRMS spectrum of **3b**

|                    |                    |                               |         |                        |                                 |
|--------------------|--------------------|-------------------------------|---------|------------------------|---------------------------------|
| <b>Sample Name</b> | WASH               | <b>Position</b>               | P2-B3   | <b>Instrument Name</b> | Instrument 1                    |
| <b>User Name</b>   |                    | <b>Inj Vol</b>                | 20      | <b>InjPosition</b>     |                                 |
| <b>Sample Type</b> | Sample             | <b>IRM Calibration Status</b> | Success | <b>Data Filename</b>   | SB-371.d                        |
| <b>ACQ Method</b>  | ESI ALS 100-1000.m | <b>Comment</b>                |         | <b>Acquired Time</b>   | 05-08-2021 17:46:19 (UTC+05:30) |

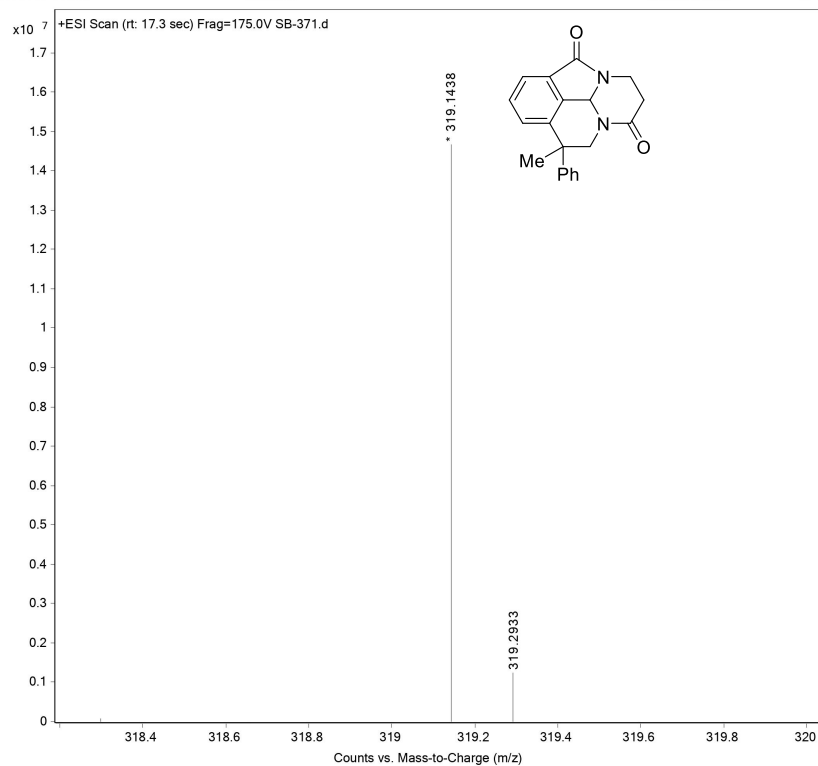

# HRMS spectrum of **3c**

|                    |                    |                               |         |                        |                                 |
|--------------------|--------------------|-------------------------------|---------|------------------------|---------------------------------|
| <b>Sample Name</b> | WASH               | <b>Position</b>               | P2-A10  | <b>Instrument Name</b> | Instrument 1                    |
| <b>User Name</b>   |                    | <b>Inj Vol</b>                | 20      | <b>InjPosition</b>     |                                 |
| <b>Sample Type</b> | Sample             | <b>IRM Calibration Status</b> | Success | <b>Data Filename</b>   | SB-353-R1.d                     |
| <b>ACQ Method</b>  | ESI ALS 100-1000.m | <b>Comment</b>                |         | <b>Acquired Time</b>   | 22-07-2021 16:47:53 (UTC+05:30) |

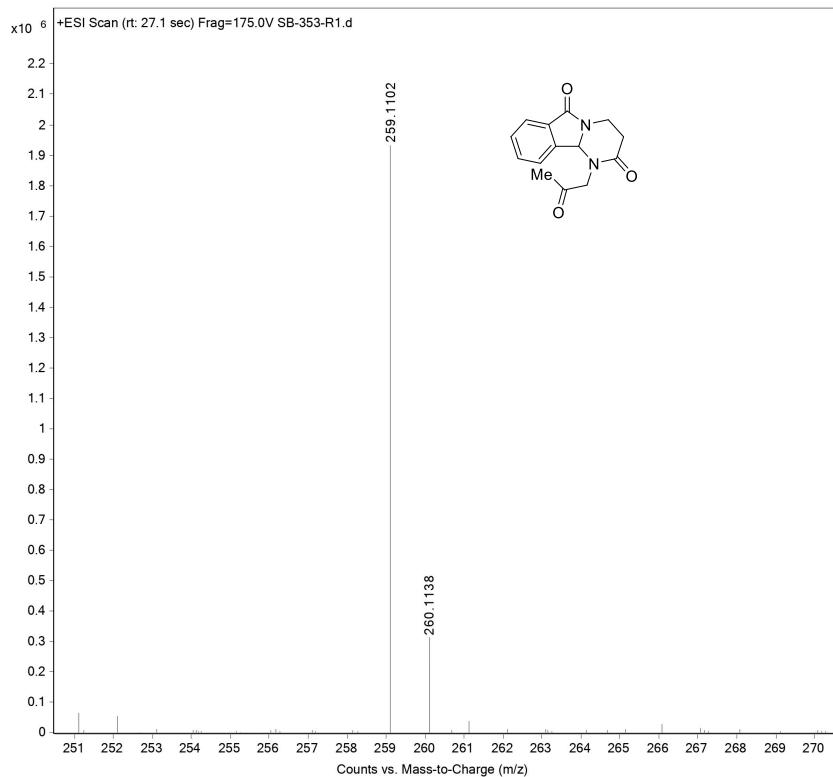

Supplement: d1cc04554g1.pdf [file d1cc04554g1.pdf]
